# Supplementary material for: Bridge control of photophysical properties in benzothiazole-phenoxazine emitters – from thermally activated delayed fluorescence to room temperature phosphorescence
Source: Royal Society of Chemistry journal article supplement (doi:10.1039/d1tc04885f), 2022-01-01
Supplement: d1tc04885f1.pdf [file d1tc04885f1.pdf]

## Electronic supplementary information

# Bridge control of photophysical properties in benzothiazole-phenoxazine emitters – from thermally activated delayed fluorescence to room temperature phosphorescence

Simon Paredis,<sup>a,b</sup> Tom Cardeynaels,<sup>a,b,c</sup> Jasper Deckers,<sup>a,b</sup> Andrew Danos,<sup>d</sup> Dirk Vanderzande,<sup>a,b</sup> Andrew P. Monkman,<sup>d</sup> Benoît Champagne<sup>c</sup> and Wouter Maes<sup>\*,a,b</sup>

<sup>a</sup> Hasselt University, Institute for Materials Research (IMO-IMOMECE), Design & Synthesis of Organic Semiconductors (DSOS), Agoralaan 1, 3590 Diepenbeek, Belgium; E-mail: wouter.maes@uhasselt.be

<sup>b</sup> IMOMECE Division, IMEC, Wetenschapspark 1, 3590 Diepenbeek, Belgium

<sup>c</sup> University of Namur, Laboratory of Theoretical Chemistry, Theoretical and Structural Physical Chemistry Unit, Namur Institute of Structured Matter, Rue de Bruxelles 61, 5000 Namur, Belgium

<sup>d</sup> OEM group, Department of Physics, Durham University, South Road, Durham DH1 3LE, United Kingdom

## Table of contents

|                                                                                          |     |
|------------------------------------------------------------------------------------------|-----|
| 1. Materials and methods .....                                                           | S2  |
| 2. Materials synthesis .....                                                             | S3  |
| 3. Ground – excited state electron density differences .....                             | S5  |
| 4. Additional TD(DFT) data .....                                                         | S6  |
| 5. Simulated UV-Vis absorption spectra .....                                             | S7  |
| 6. Absorption and emission spectra and data in different solvents .....                  | S8  |
| 7. Relaxed potential energy surface scans .....                                          | S3  |
| 8. Photodegradation .....                                                                | S3  |
| 9. Time-resolved emission spectra in zeonex .....                                        | S3  |
| 10. Steady-state emission spectra in air and under inert atmosphere in zeonex film ..... | S3  |
| 11. Laser energy experiments .....                                                       | S3  |
| 12. Time-resolved emission spectra in solution .....                                     | S3  |
| 13. Singlet oxygen generation .....                                                      | S3  |
| 14. NMR spectra .....                                                                    | S3  |
| 15. Coordinates of optimized geometries .....                                            | S37 |

## 1. Materials and methods

All reagents and chemicals were obtained from commercial sources and used without further purification. Dry solvents were obtained from an MBraun solvent purification system (MB SPS-800) equipped with alumina columns. Preparative (recycling) size exclusion chromatography (SEC) was performed on a JAI LC-9110 NEXT system equipped with JAIGEL 1H and 2H columns (eluent chloroform, flow rate 3.5 mL min<sup>-1</sup>). Proton and carbon nuclear magnetic resonance (<sup>1</sup>H and <sup>13</sup>C NMR) spectra were obtained on a Varian or Jeol spectrometer operating at 400 MHz for <sup>1</sup>H (100 MHz for <sup>13</sup>C). Chemical shifts ( $\delta$ ) are given in ppm relative to CDCl<sub>3</sub> ( $\delta = 7.26$  ppm for <sup>1</sup>H NMR,  $\delta = 77.06$  ppm for <sup>13</sup>C NMR). Electrospray ionisation - mass spectrometry (ESI-MS) was performed using an LTQ Orbitrap Velos Pro mass spectrometer (ThermoFisher Scientific) equipped with an atmospheric pressure ionization source operating in the nebulizer assisted electrospray mode. The instrument was calibrated in the  $m/z$  range 220–2000 using a standard solution containing caffeine, MRFA, and Ultramark 1621. A constant spray voltage of 5 kV was used and a nitrogen flow was applied at a dimensionless sheath gas flow rate of 7. The capillary temperature was set to 275 °C. A solvent mixture of HPLC grade THF and methanol (3:2) was used. Spectra were analysed via Thermo Xcalibur Qual Browser software.

Electronic absorption spectra of the small molecule chromophores in solution were recorded on a Varian Cary 5000 UV-Vis-NIR spectrophotometer from Agilent Technologies. Corrected steady-state excitation and emission spectra of the chromophore solutions were recorded on a Horiba-Jobin Yvon Fluorolog-3 spectrofluorometer equipped with a 450 W Xe lamp as the light source, with an excitation wavelength ( $\lambda_{exc}$ ) depending on the fluorescence quantum yield standard used and a slit width of 2 nm. Freshly prepared samples in 1 cm quartz cells were used to perform all UV-Vis-NIR absorption and fluorescence measurements. The fluorescence measurements were done under a right-angle arrangement. The standard uncertainty (square root of the variance) on the absorption and emission maxima is approximately 1 nm. Spectroscopic measurements under normal atmosphere were done in non-degassed spectroscopic grade solvents at 20 °C. Inert atmosphere was created by three consecutive freeze-pump-thaw cycles.

For the determination of the relative fluorescence quantum yields ( $\Phi_f$ ) in toluene, dilute solutions with an absorbance around 0.1 at the excitation wavelength were used. Quinine ( $\lambda_{exc} = 347$  nm,  $\Phi_f = 0.58$  in 0.1 M H<sub>2</sub>SO<sub>4</sub> solution) was used as a standard to determine the fluorescence quantum yields.<sup>1</sup> The fluorescence quantum yield of the tested compound ( $\Phi_x$ ) was calculated using Equation (1), in which  $\Phi_{st}$  is the fluorescence quantum yield of the standard,  $F_x$  and  $F_{st}$  are the integrated fluorescence of the test compound and the standard,  $A_x$  and  $A_{st}$  are the absorbance of the test compound and the standard at the excitation wavelength, and  $n_x$  and  $n_{st}$  are the refractive indices of the solvents in which the test compound and the standard were dissolved, respectively.

$$\Phi_x = \Phi_{st} \frac{F_x(1-10^{-A_{st}})n_x^2}{F_{st}(1-10^{-A_x})n_{st}^2} \quad (1)$$

1,3-Diphenylisobenzofuran (1,3-DPBF) was used as a singlet oxygen (<sup>1</sup>O<sub>2</sub>) scavenger to determine the singlet oxygen quantum yields ( $\Phi_\Delta$ ). The <sup>1</sup>O<sub>2</sub> production was monitored by following the absorbance of 1,3-DPBF at 414 nm upon excitation of the respective chromophore at 325 nm using a single LED325W2 from Thorlabs ( $\lambda_{exc} = 325 \pm 5$  nm, fwhm = 11 nm,  $P = 1.7$  mW). To determine  $\Phi_\Delta$ , a relative method was used according to Equation (2). Here,  $x$  and  $st$  represent the sample and the standard, while  $\Phi$ ,  $A$ ,  $m$ , and  $n$  represent the singlet oxygen quantum yield, the absorbance at the excitation wavelength ( $\lambda_{exc} = 325$  nm), the slope of the decrease in absorbance of 1,3-DPBF over time, and the refractive index of the solvent used for the measurement, respectively. Optically matched solutions with an absorbance around 0.6 at 414 nm and 0.3 at 325 nm were used. Coronene was used as the standard ( $\Phi_\Delta = 0.90$  in spectrograde toluene).<sup>2</sup> The solutions were continuously stirred during all measurements using a Cimareci magnetic stirrer.

1. A. M. Brouwer, *Pure Appl. Chem.*, 2011, **83**, 2213–2228.

2. F. Wilkinson, W. P. Helman and A. B. Ross, *J. Phys. Chem. Ref. Data*, 1993, **22**, 113–262.

$$\Phi_x = \Phi_{st} \left( \frac{1-10^{-A_{st}}}{1-10^{-Ax}} \right) \left( \frac{m_x}{m_{st}} \right) \left( \frac{n_x}{n_{st}} \right)^2 \quad (2)$$

Molar extinction coefficients were obtained by dissolving ca. 1 mg of the respective benzothiazole-phenoxazine molecule in toluene (ca. 2 mL). This stock solution was serially diluted to yield different dye concentrations from which absorption spectra were obtained in quartz cells with 1 cm optical path length ( $l$ ). Minimal three solutions with an absorbance between 0.01 and 0.1 at  $\lambda_{obs}(max)$  were used to plot the absorbance ( $A$ ) versus molar concentration ( $c$ ). The molar extinction coefficient ( $\epsilon$ ) was then determined using the Beer-Lambert law as given in Equation (3).

$$A = \epsilon lc \quad (3)$$

Zeonex films were prepared via drop-casting using a mixture of the emitter and host (zeonex) in toluene at 1 wt%. The initial solution concentrations were 100 mg mL<sup>-1</sup> of zeonex and 1 mg mL<sup>-1</sup> of emissive material, combined in equal volumes. The films were drop-casted onto a quartz substrate at 65 °C to facilitate evaporation of the solvent. Absorption and emission spectra of the films were collected using a UV-3600 double beam spectrophotometer (Shimadzu) and a Fluoromax fluorimeter (Jobin Yvon). Time-resolved photoluminescence spectra and decays were recorded using a nanosecond gated spectrograph-coupled iCCD (Stanford) using an Nd:YAG laser emitting at 355 nm (EKSPLA) under vacuum for films or following freeze-pump-thaw cycles or argon bubbling for solutions. Laser power experiments were conducted using an N<sub>2</sub> laser (Lasertechnik Berlin) emitting at 337 nm with the same nanosecond gated spectrograph-coupled iCCD (Stanford) camera, attenuating the excitation using reflective neutral density filters. Photodegradation experiments were performed before and after intermittent periods of light irradiation with a 325 nm LED (1.7 mW). The solution was purged with nitrogen to minimise the amount of oxygen in the samples. Photoluminescence quantum yields in film were determined using a calibrated integrating sphere (Horiba Quanta-Phi) fibre-coupled to a spectrofluorometer (Horiba Fluorolog) as excitation source (400 nm) and as detection system. For the measurements in inert atmosphere, the sphere was flushed with a stream of dry nitrogen for at least 30 min to prevent oxygen quenching of triplets.

## 2. Materials synthesis

### 2-(4-bromophenyl)benzo[d]thiazole (**BTaz-Ph**)

**General procedure 1:** 4-Bromobenzaldehyde (169.2 mg, 914.5  $\mu$ mol), 2-aminobenzenethiol (119.5 mg, 954.5  $\mu$ mol), and sodium metabisulfite (186.9 mg, 983.2  $\mu$ mol) were dissolved in DMF (5 mL) and the mixture was stirred under reflux for 2 h. Afterwards, the reaction mixture was cooled down to room temperature, water was added, and an extraction with ethyl acetate was performed. The combined organic phase was dried over anhydrous MgSO<sub>4</sub>, filtered, and concentrated under reduced pressure. The crude product was purified by column chromatography (silica) with CH<sub>2</sub>Cl<sub>2</sub>/petroleum ether (v/v = 40/60) as the eluent. 2-(4-Bromophenyl)benzo[d]thiazole was obtained as a yellow solid in 65% yield (172.4 mg). <sup>1</sup>H NMR (400 MHz, CDCl<sub>3</sub>): 8.07 (d,  $J$  = 8.1 Hz, 1H), 7.96 (d,  $J$  = 8.3 Hz, 2H), 7.89 (d,  $J$  = 8.1 Hz, 1H), 7.63 (d,  $J$  = 8.3 Hz, 2H), 7.51 (ddd,  $J$  = 8.3, 7.2, 1.2 Hz, 1H), 7.40 (ddd,  $J$  = 8.3, 7.2, 1.2 Hz, 1H). <sup>13</sup>C NMR (100 MHz, CDCl<sub>3</sub>): 166.8, 154.2, 135.1, 132.6, 132.3, 129.0, 126.6, 125.6, 125.5, 123.4, 121.8. MS (ESI+) Calcd. for C<sub>13</sub>H<sub>9</sub>BrNS [M+H]<sup>+</sup>:  $m/z$  289.9639 (100%), found: 289.9624.

### 2-(6-bromonaphthalen-2-yl)benzo[d]thiazole (**BTaz-Na**)

Synthesis according to general procedure 1: 6-bromo-2-naphthaldehyde (201.4 mg, 856.7  $\mu$ mol), 2-aminobenzenethiol (114.0 mg, 910.6  $\mu$ mol), sodium metabisulfite (167.5 mg, 881.1  $\mu$ mol), DMF (5 mL), eluent CH<sub>2</sub>Cl<sub>2</sub>/petroleum ether (v/v = 60/40); 64% yield (185.2 mg). <sup>1</sup>H NMR (400 MHz, CDCl<sub>3</sub>): 8.53 (s, 1H), 8.22 (dd,  $J$  = 8.6, 1.8 Hz, 1H), 8.11 (d,  $J$  = 8.1 Hz, 1H), 8.04 (d,  $J$  = 2.0 Hz, 1H), 7.93 (d,  $J$  = 8.1 Hz, 1H), 7.85 (d,  $J$  = 8.6 Hz, 1H), 7.83 (d,  $J$  = 8.7 Hz, 1H), 7.62 (dd,  $J$  = 8.7, 2.0 Hz, 1H), 7.52 (ddd,  $J$  = 8.3, 7.2, 1.3 Hz, 1H), 7.42 (ddd,  $J$  = 8.3, 7.2, 1.3 Hz, 1H). <sup>13</sup>C NMR (100 MHz, CDCl<sub>3</sub>): 167.7, 154.3, 135.6, 135.2, 131.7, 131.52,

130.51, 130.50, 130.1, 128.0, 127.5, 126.7, 125.7, 125.6, 123.5, 121.84, 121.80. MS (ESI+) Calcd. for C<sub>17</sub>H<sub>11</sub>BrNS [M+H]<sup>+</sup>: *m/z* 339.9796 (100%), found: 339.9760.

#### 2-(5-bromothiophen-2-yl)benzo[d]thiazole (**BTaz-Th**)

Synthesis according to general procedure 1: 5-bromothiophene-2-carbaldehyde (280 μL, 2.35 mmol), 2-aminobenzenethiol (289.2 mg, 2.31 mmol), sodium metabisulfite (448 mg, 2.36 mmol), DMF (10 mL), eluent CH<sub>2</sub>Cl<sub>2</sub>/petroleum ether (v/v = 40/60); 17% yield (118.3 mg). <sup>1</sup>H NMR (400 MHz, CDCl<sub>3</sub>): 8.01 (d, *J* = 8.1 Hz, 1H), 7.85 (d, *J* = 8.1 Hz, 1H), 7.48 (ddd, *J* = 8.2, 7.2, 1.3 Hz, 1H), 7.39 (d, *J* = 4.0 Hz, 1H), 7.38 (ddd, *J* = 8.2, 7.2, 1.3 Hz, 1H), 7.08 (d, *J* = 4.0 Hz, 1H). <sup>13</sup>C NMR (100 MHz, CDCl<sub>3</sub>): 160.4, 153.6, 138.9, 134.6, 131.1, 128.6, 126.7, 125.6, 123.2, 121.7, 117.3. MS (ESI+) Calcd. for C<sub>11</sub>H<sub>7</sub>BrNS<sub>2</sub> [M+H]<sup>+</sup>: *m/z* 295.9203 (100%), found: 295.9186.

#### 10-(4-(benzo[d]thiazol-2-yl)phenyl)-10H-phenoxazine (**BTaz-Ph-PXZ**)

**General procedure 2:** 2-(4-Bromophenyl)benzo[d]thiazole (153.0 mg, 527 μmol), 10H-phenoxazine (109.1 mg, 595.5 μmol), palladium(II) acetate (11.8 mg, 52.7 μmol), tri-*tert*-butylphosphine (21.2 mg, 105.0 μmol), and sodium *tert*-butoxide (111.3 mg, 1.16 mmol) were dissolved in dry toluene (12 mL) under argon atmosphere. The mixture was heated to reflux for 16 h while stirring and then cooled down to room temperature and concentrated under reduced pressure. The crude product was purified by column chromatography (silica) with CH<sub>2</sub>Cl<sub>2</sub>/petroleum ether (v/v = 50/50) as the eluent. **BTaz-Ph-PXZ** was further purified using preparative (recycling) SEC and was obtained as a yellow solid (115.8 mg, 58%). <sup>1</sup>H NMR (400 MHz, CDCl<sub>3</sub>): 8.32 (d, *J* = 8.4 Hz, 2H), 8.12 (d, *J* = 8.2 Hz, 1H), 7.96 (d, *J* = 8.0 Hz, 1H), 7.56–7.48 (m, 3H), 7.44 (ddd, *J* = 8.3, 7.2, 1.2 Hz, 1H), 6.82–6.42 (m, 6H), 6.02 (d, *J* = 7.8 Hz, 2H). <sup>13</sup>C NMR (100 MHz, CDCl<sub>3</sub>): 166.8, 154.3, 144.1, 141.6, 135.4, 134.1, 133.8, 131.7, 130.3, 126.7, 125.7, 123.6, 123.5, 121.9, 121.8, 115.8, 113.4. MS (ESI+) Calcd. for C<sub>25</sub>H<sub>17</sub>N<sub>2</sub>O<sub>5</sub> [M+H]<sup>+</sup>: *m/z* 393.1061, found: 393.1027.

#### 10-(6-(benzo[d]thiazol-2-yl)naphthalen-2-yl)-10H-phenoxazine (**BTaz-Na-PXZ**)

Synthesis according to general procedure 2: 2-(6-bromonaphthalen-2-yl)benzo[d]thiazole (157.0 mg, 461 μmol), 10H-phenoxazine (93.3 mg, 508 μmol), palladium(II) acetate (10.4 mg, 46.1 μmol), tri-*tert*-butylphosphine (18.7 mg, 92.3 μmol), sodium *tert*-butoxide (88.7 mg, 88.7 μmol), dry toluene (12 mL), eluent CH<sub>2</sub>Cl<sub>2</sub>/petroleum ether (v/v = 50/50); yellow solid (138.7 mg, 68%). <sup>1</sup>H NMR (400 MHz, CDCl<sub>3</sub>): 8.66 (s, 1H), 8.29 (dd, *J* = 8.6, 1.8 Hz, 1H), 8.21 (d, *J* = 8.6 Hz, 1H), 8.15 (ddd, *J* = 8.2, 1.3, 0.7 Hz, 1H), 8.01–7.94 (m, 2H), 7.92 (d, *J* = 1.8 Hz, 1H), 7.55 (ddd, *J* = 8.2, 7.2, 1.2 Hz, 1H), 7.50 (dd, *J* = 8.6, 2.0 Hz, 1H), 7.44 (ddd, *J* = 8.1, 7.2, 1.1 Hz, 1H), 6.73 (dd, *J* = 7.8, 1.6 Hz, 2H), 6.67 (td, *J* = 7.6, 1.5 Hz, 2H), 6.59 (td, *J* = 7.7, 1.7 Hz, 2H), 5.99 (dd, *J* = 7.9, 1.5 Hz, 2H). <sup>13</sup>C NMR (100 MHz, CDCl<sub>3</sub>): 167.7, 154.4, 144.1, 137.9, 136.0, 135.3, 134.3, 132.9, 132.4, 132.2, 130.2, 129.3, 129.0, 127.5, 126.7, 125.7, 125.4, 123.5, 123.4, 121.9, 121.7, 115.7, 113.6. MS (ESI+) Calcd. for C<sub>29</sub>H<sub>18</sub>N<sub>2</sub>O<sub>5</sub> [M+H]<sup>+</sup>: *m/z* 443.1218, found: 443.1203.

#### 10-(5-(benzo[d]thiazol-2-yl)thiophen-2-yl)-10H-phenoxazine (**BTaz-Th-PXZ**)

Synthesis according to general procedure 2: 2-(5-bromothiophen-2-yl)benzo[d]thiazole (118 mg, 398 μmol), 10H-phenoxazine (79.2 mg, 432 μmol), palladium(II) acetate (8.9 mg, 40 μmol), tri-*tert*-butylphosphine (16.1 mg, 80 μmol), sodium *tert*-butoxide (76.6 mg, 797 μmol), dry toluene (12 mL), eluent CH<sub>2</sub>Cl<sub>2</sub>/petroleum ether (v/v = 40/60); yellow solid (115.8 mg, 75%). <sup>1</sup>H NMR (400 MHz, CDCl<sub>3</sub>): 8.04 (d, *J* = 8.1 Hz, 1H), 7.89 (d, *J* = 8.0 Hz, 1H), 7.70 (d, *J* = 3.9 Hz, 1H), 7.49 (dd, *J* = 8.2, 1.2 Hz, 1H), 7.41 (ddd, *J* = 8.3, 7.2, 1.2 Hz, 1H), 7.07 (d, *J* = 3.9 Hz, 1H), 6.78–6.70 (m, 6H), 6.40 (dt, *J* = 7.3, 1.2 Hz, 2H). <sup>13</sup>C NMR (100 MHz, CDCl<sub>3</sub>): 161.0, 153.7, 144.1, 137.5, 134.8, 133.6, 129.7, 127.9, 126.8, 125.7, 123.7, 123.4, 122.8, 121.7, 115.9, 114.4. MS (ESI+) Calcd. for C<sub>23</sub>H<sub>15</sub>N<sub>2</sub>O<sub>5</sub> [M+H]<sup>+</sup>: *m/z* 399.0626, found: 399.0606.

### 3. Ground – excited state electron density differences

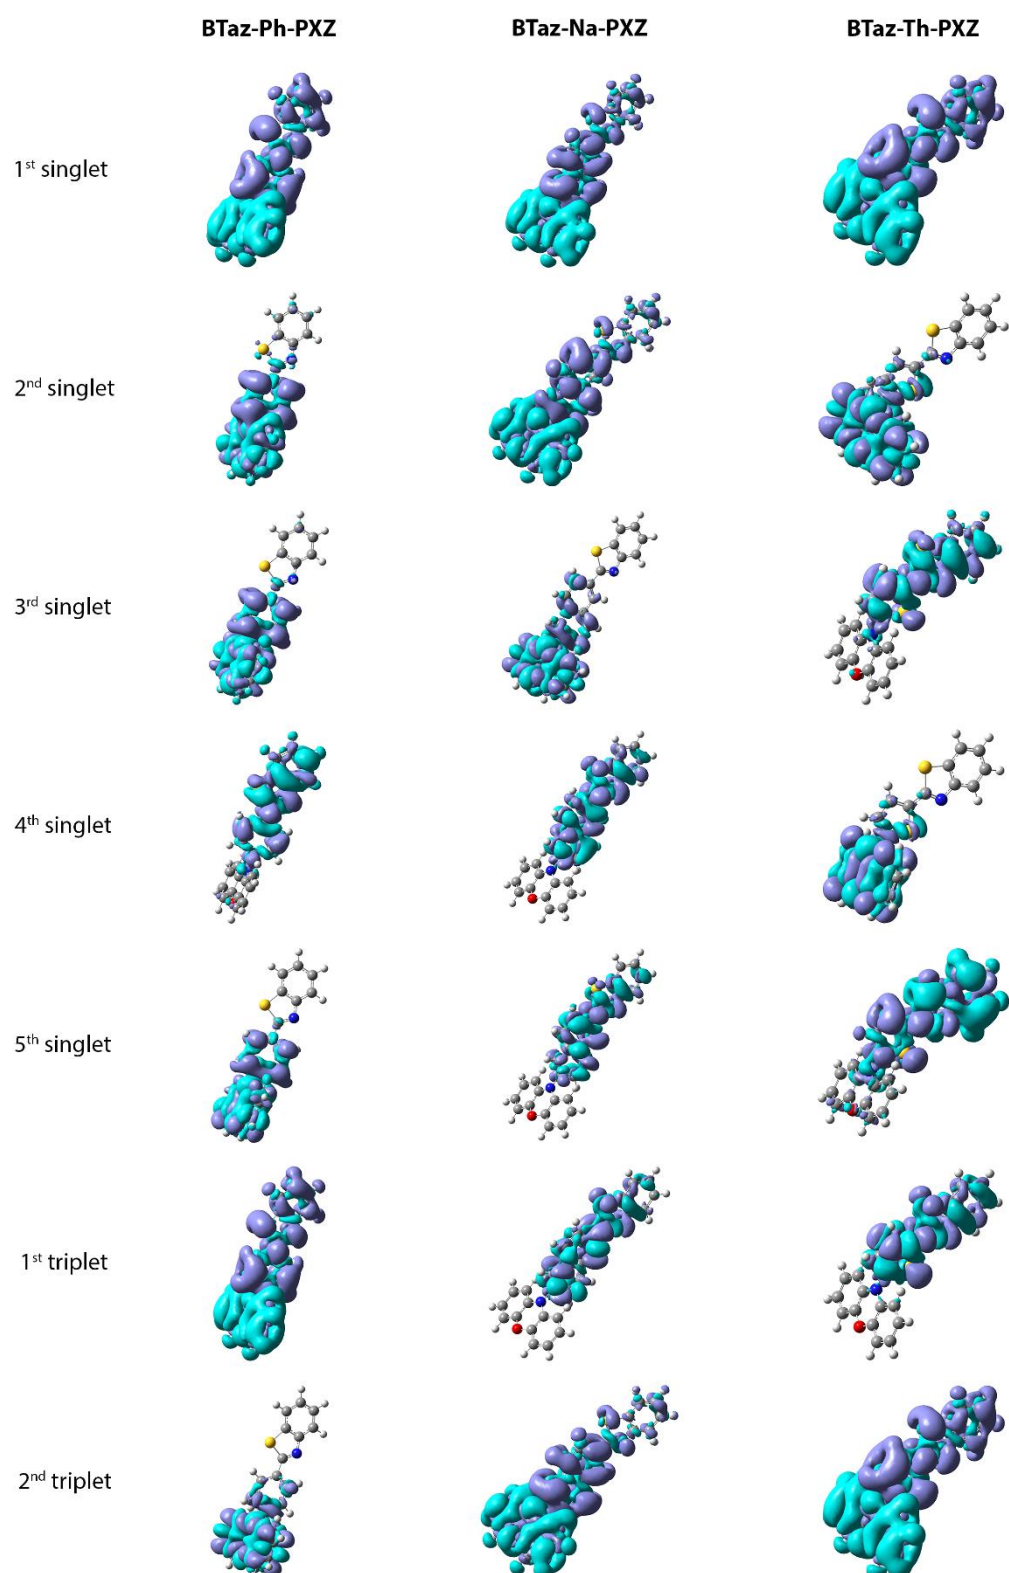

**Figure S1:** Ground – excited state electron density differences for the singlet and triplet excited states of **BTaz-Ph-PXZ** (left), **BTaz-Na-PXZ** (middle), and **BTaz-Th-PXZ** (right). Purple areas indicate increased electron density, while cyan areas point to decreased electron density (isosurface value = 0.0004 a.u. for all densities).

## 4. Additional TD(DFT) data

**Table S1:** TDDFT results for the third, fourth, and fifth vertical singlet excitation energies and the corresponding oscillator strengths ( $f$ ) as determined with TDDFT-TDA and a modified LC-BLYP ( $\omega = 0.17 \text{ bohr}^{-1}$ ) exchange correlation functional.

| Compound           | $S_3$ (eV) | $f_{S_3}$ | $S_4$ (eV) | $f_{S_4}$ | $S_5$ (eV) | $f_{S_5}$ |
|--------------------|------------|-----------|------------|-----------|------------|-----------|
| <b>BTaz-Ph-PXZ</b> | 3.86       | 0.101     | 4.15       | 0.806     | 4.26       | 0.136     |
| <b>BTaz-Na-PXZ</b> | 3.82       | 0.061     | 3.93       | 1.031     | 4.05       | 0.227     |
| <b>BTaz-Th-PXZ</b> | 3.90       | 1.043     | 4.18       | 0.194     | 4.27       | 0.110     |

**Table S2:** Nature of the various transitions ( $H = \text{HOMO}$ ,  $L = \text{LUMO}$ ), charge-transfer distance ( $d_{CT}$ ), and change in dipole moment ( $\Delta\mu$ , excited state dipole – ground state dipole) accompanying the  $S_0 \rightarrow S_x$  ( $x = 3, 4, 5$ ) transitions in cyclohexane, as determined with TDDFT-TDA and a modified LC-BLYP ( $\omega = 0.17 \text{ bohr}^{-1}$ ) exchange correlation functional.

| Compound           | $S_3$  |              |                 | $S_4$  |              |                 | $S_5$   |              |                 |
|--------------------|--------|--------------|-----------------|--------|--------------|-----------------|---------|--------------|-----------------|
|                    | Nature | $d_{CT}$ (Å) | $\Delta\mu$ (D) | Nature | $d_{CT}$ (Å) | $\Delta\mu$ (D) | Nature  | $d_{CT}$ (Å) | $\Delta\mu$ (D) |
| <b>BTaz-Ph-PXZ</b> | H→L+3  | 1.636        | 4.680           | H-2→L  | 1.726        | 3.325           | H→L+7   | 1.210        | 2.797           |
| <b>BTaz-Na-PXZ</b> | H→L+2  | 1.140        | 3.047           | H-1→L  | 0.980        | 1.771           | H-3/4→L | 0.744        | 1.019           |
| <b>BTaz-Th-PXZ</b> | H-1→L  | 0.840        | 1.512           | H→L+5  | 0.458        | 0.878           | H-3→L   | 2.734        | 6.597           |

**Table S3:** Orbital energies for **BTaz-Ph-PXZ**, **BTaz-Na-PXZ**, and **BTaz-Th-PXZ** as obtained using DFT with LC-BLYP ( $\omega = 0.17 \text{ bohr}^{-1}$ )/6-311G(d).

|                    | HOMO-1 (eV) | HOMO (eV) | LUMO (eV) | LUMO+1 (eV) |
|--------------------|-------------|-----------|-----------|-------------|
| <b>BTaz-Ph-PXZ</b> | -7.745      | -6.258    | -0.698    | 0.461       |
| <b>BTaz-Na-PXZ</b> | -7.506      | -6.275    | -0.820    | -0.057      |
| <b>BTaz-Th-PXZ</b> | -7.559      | -6.387    | -0.779    | 0.758       |

## 5. Simulated UV-Vis absorption spectra

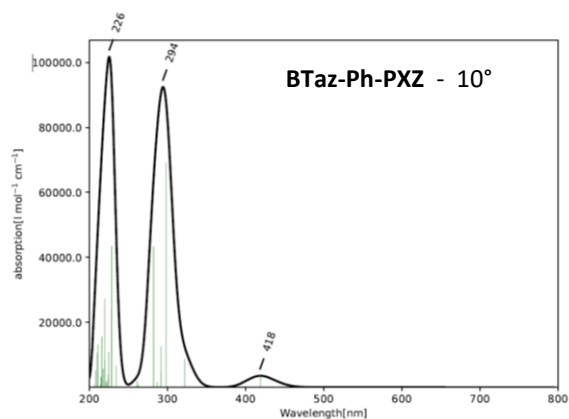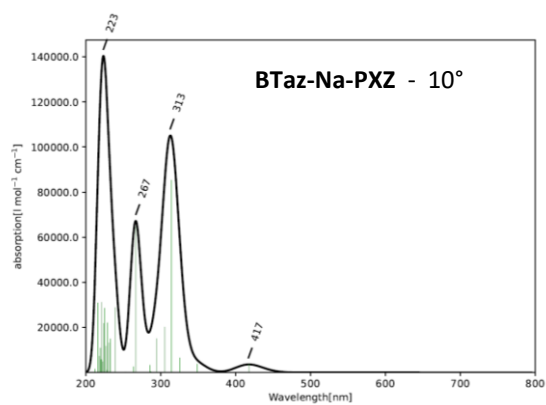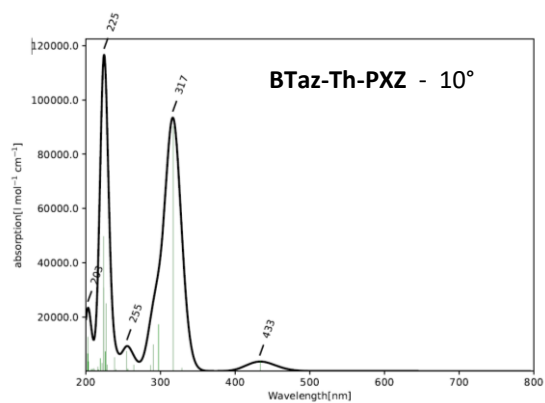

**Figure S2:** Simulated UV-Vis absorption spectra derived from the TDDFT results for the optimized geometries with a modified dihedral angle of  $\pm 10^\circ$  to account for the vibrational freedom of the PXZ moiety with respect to the rest of the molecule. A full-width at half maximum of 0.3 eV was applied for every excitation energy.

## 6. Absorption and emission spectra and data in different solvents

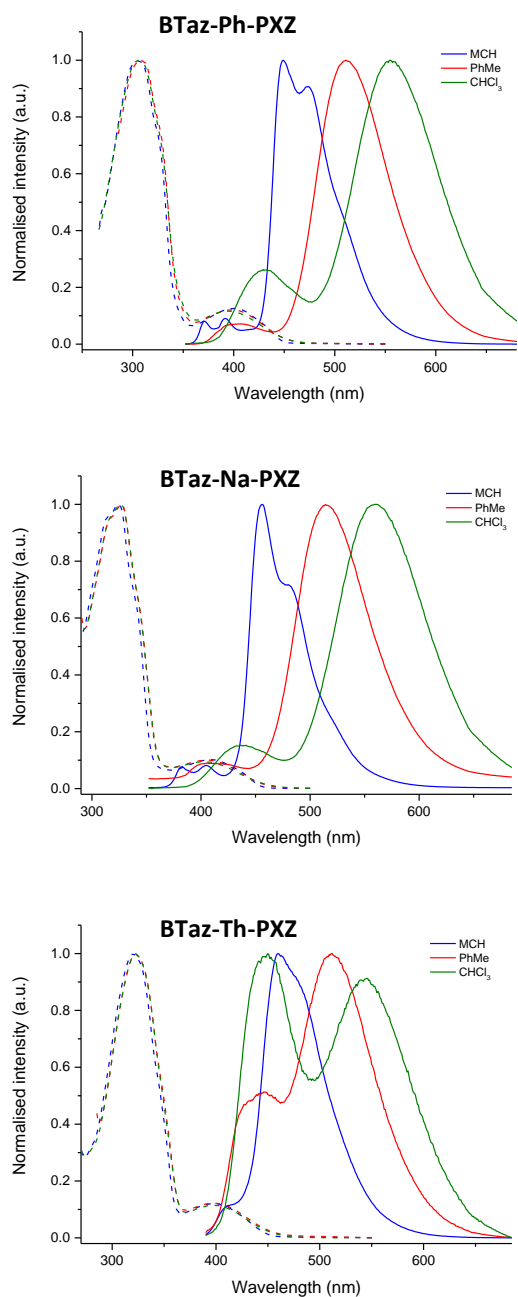

**Figure S3:** Normalised steady-state absorption (dotted lines) and emission (solid lines;  $\lambda_{exc} = 340$  nm) spectra in methylcyclohexane (MCH), toluene (PhMe), and chloroform (CHCl<sub>3</sub>) for **BTaz-Ph-PXZ** (top), **BTaz-Na-PXZ** (middle), and **BTaz-Th-PXZ** (bottom).



**Table S4:** Additional spectroscopic data for **BTaz-Ph-PXZ**, **BTaz-Na-PXZ**, and **BTaz-Th-PXZ**.

| Compound           | Solvent <sup>[a]</sup> | $\lambda_{abs}$<br>(nm) <sup>[b]</sup> | $\lambda_{em}$<br>(nm) <sup>[c]</sup> | $\Phi_f$ <sup>[d]</sup> |
|--------------------|------------------------|----------------------------------------|---------------------------------------|-------------------------|
| <b>BTaz-Ph-PXZ</b> | Methylcyclohexane      | 306,<br>401                            | 391,<br>449                           | 0.10                    |
|                    | Toluene                | 308,<br>401                            | 407,<br>513                           | 0.22                    |
|                    | Chloroform             | 306,<br>395                            | 429,<br>555                           | 0.12                    |
| <b>BTaz-Na-PXZ</b> | Methylcyclohexane      | 324,<br>410                            | 405,<br>456                           | 0.10                    |
|                    | Toluene                | 327,<br>405                            | 406,<br>516                           | 0.13                    |
|                    | Chloroform             | 327,<br>404                            | 441,<br>559                           | 0.13                    |
| <b>BTaz-Th-PXZ</b> | Methylcyclohexane      | 320,<br>398                            | 411,<br>460                           | 0.05                    |
|                    | Toluene                | 323,<br>397                            | 446,<br>514                           | 0.02                    |
|                    | Chloroform             | 323,<br>398                            | 450,<br>546                           | 0.02                    |

<sup>[a]</sup> Spectrograde solvents were used for all measurements. Solvents are listed from top to bottom according to increasing polarity  $E_T(30)$ . <sup>[b]</sup> Absorption maxima. <sup>[c]</sup> Fluorescence emission maxima. <sup>[d]</sup> Fluorescence quantum yields under normal atmosphere determined vs quinine ( $\Phi_f = 0.58$ ,  $\lambda_{exc} = 347$  nm) in 0.1 M  $H_2SO_4$  solution as a reference.

## 7. Relaxed potential energy surface scans

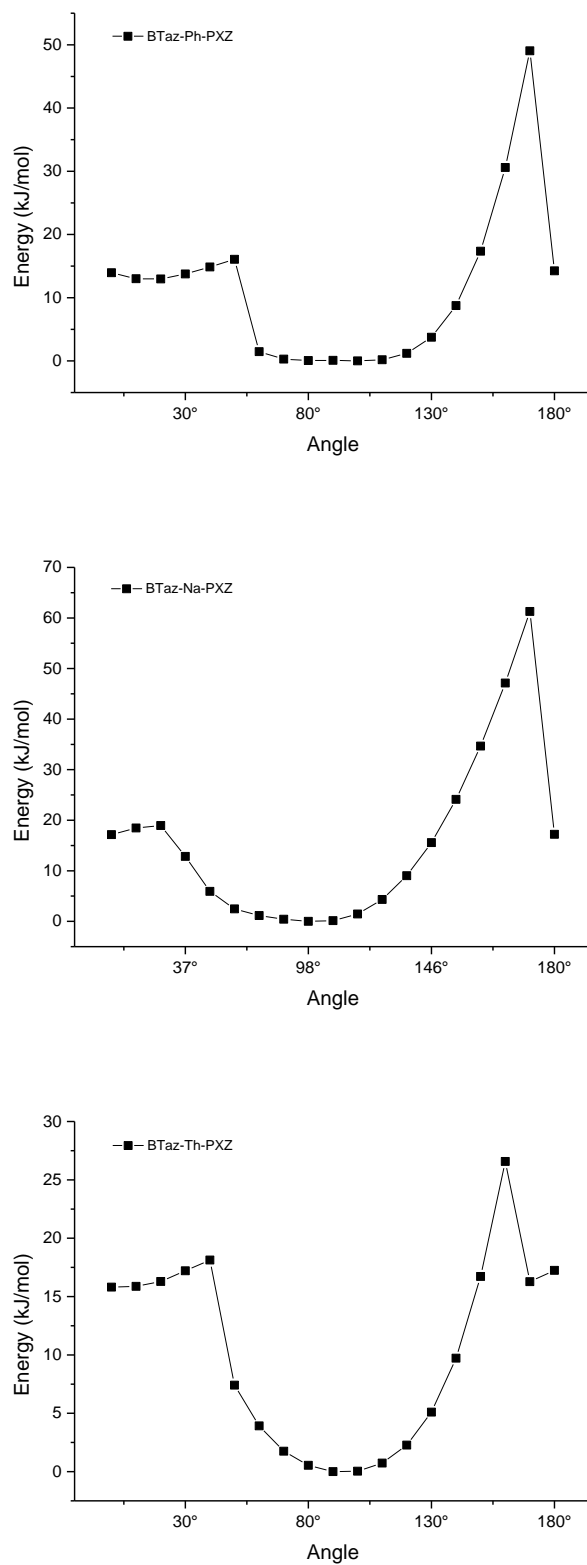

**Figure S4:** Relaxed potential energy surface scans for *BTaz-Ph-PXZ* (top), *BTaz-Na-PXZ* (middle), and *BTaz-Th-PXZ* (bottom). These calculations were performed using the M06/6-311G(d) method.<sup>3</sup>

## 8. Photodegradation

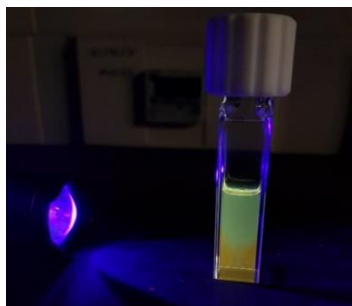

**Figure S5:** Photograph of a cuvette containing a *BTaz-Ph-PXZ* solution in chloroform after irradiation with an  $N_2$  laser emitting at 337 nm, showing a clear colour change on the top part of the solution where the light hits the sample, whereas the bottom part retains the same colour as the pristine solution. This colour change was not, or barely, visible in toluene.

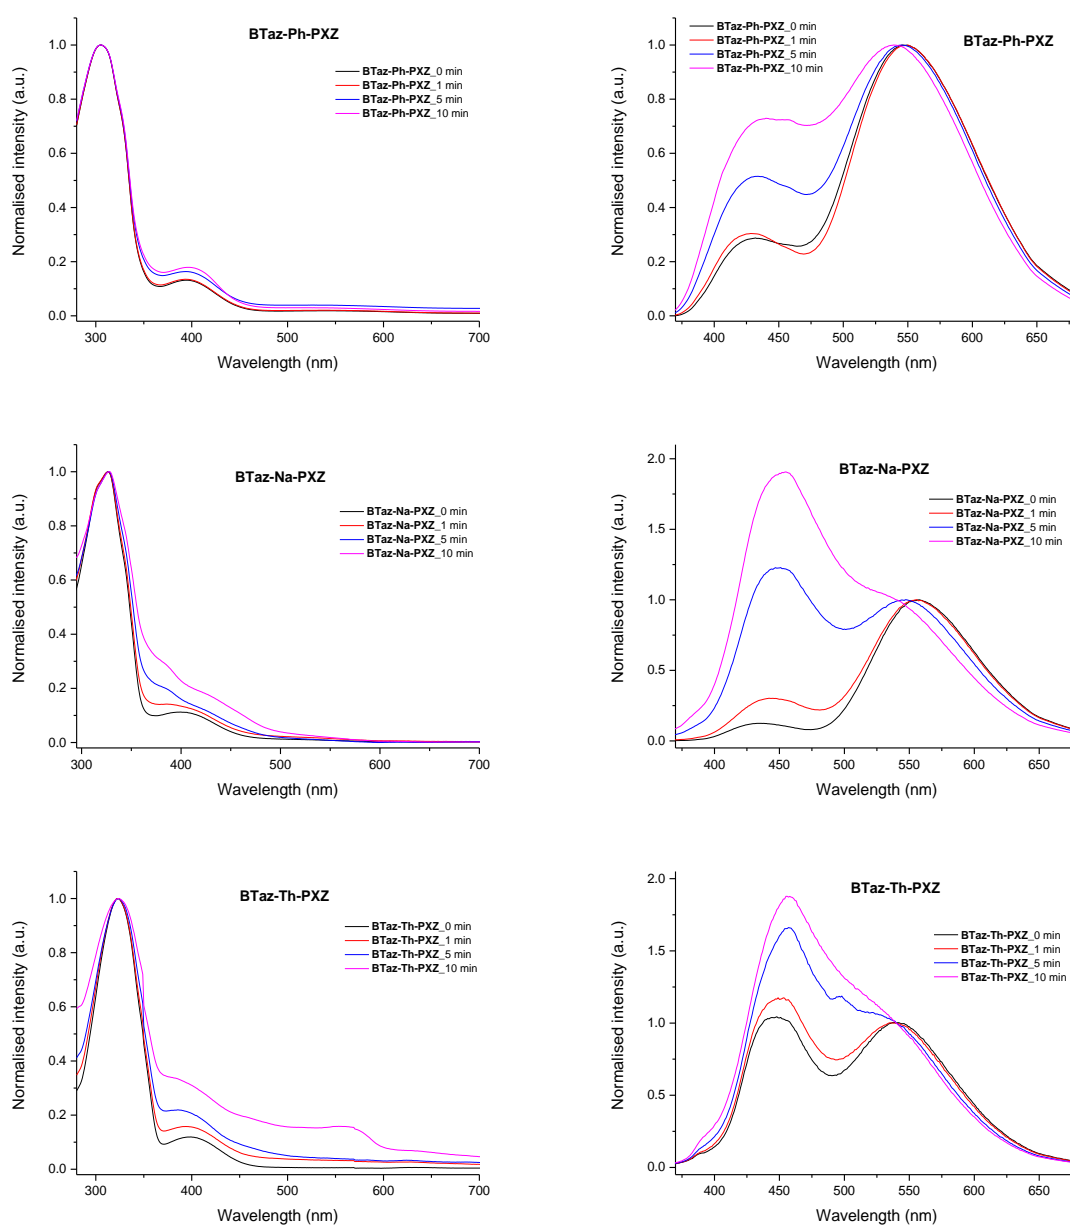

**Figure S6:** Absorption (left) and emission (right) spectra of *BTaz-Ph-PXZ* (top), *BTaz-Na-PXZ* (middle), and *BTaz-Th-PXZ* (bottom) in chloroform recorded after intermittent periods of irradiation with a 325 nm LED (1.7 mW).

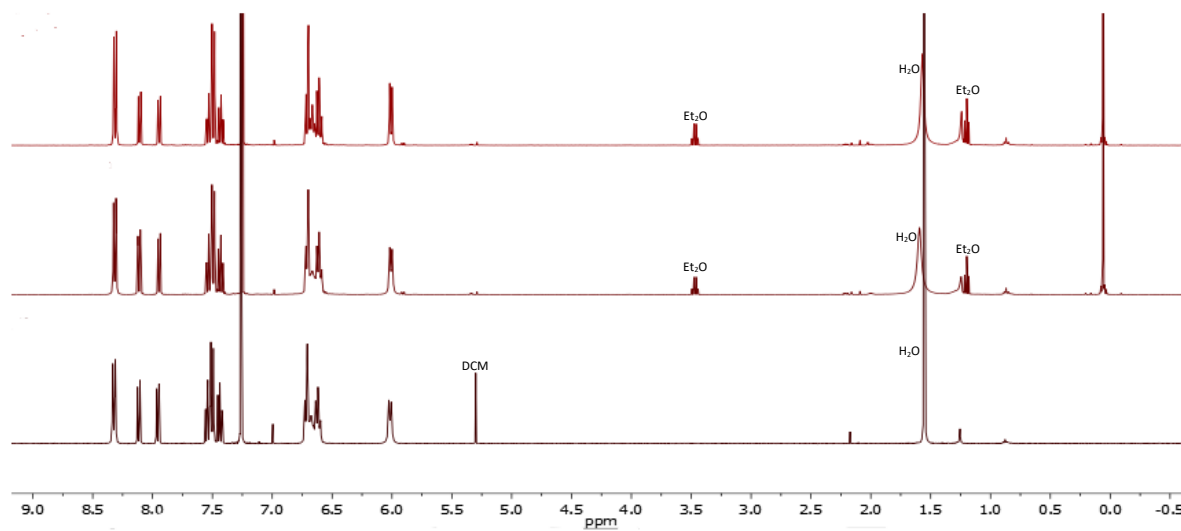

**Figure S7:**  $^1\text{H}$  NMR spectra of **BTaz-Ph-PXZ** before irradiation (bottom) and after irradiating with a 325 nm LED (1.7 mW) for 30 min (middle) and 60 min (top).

## 9. Time-resolved emission spectra in zeonex

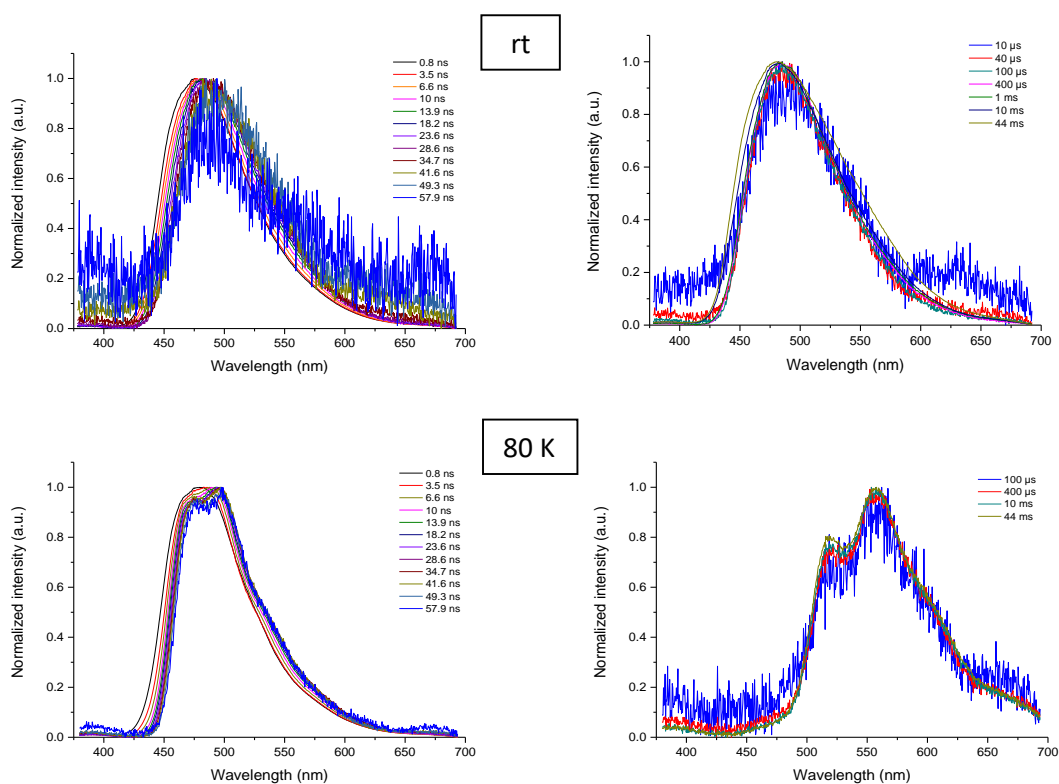

**Figure S8:** Snapshots of the emission at various time scales during prompt (left) and delayed emission (right) for **BTaz-Ph-PXZ** in zeonex at room temperature (top) and at 80 K (bottom).

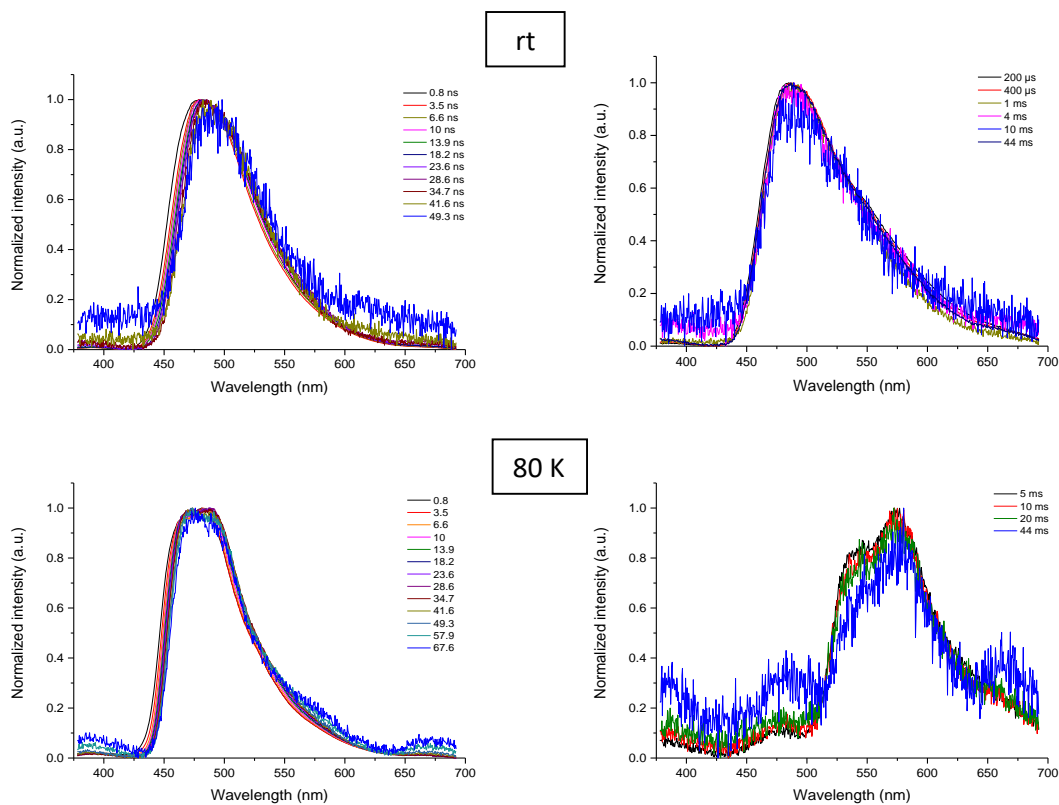

**Figure S9:** Snapshots of the emission at various time scales during prompt (left) and delayed emission (right) for **BTaz-Na-PXZ** in zeonex at room temperature (top) and at 80 K (bottom).

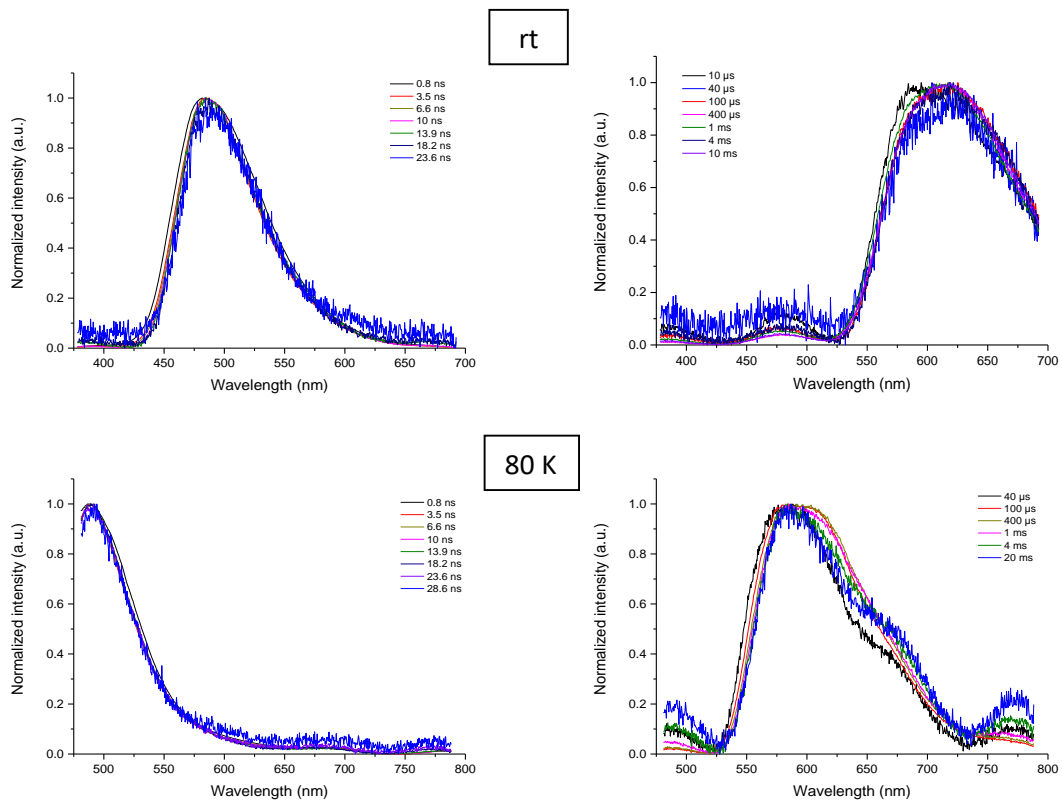

**Figure S10:** Snapshots of the emission at various time scales during prompt (left) and delayed emission (right) for **BTaz-Th-PXZ** in zeonex at room temperature (top) and at 80 K (bottom).

## 10. Steady-state emission spectra in air and under inert atmosphere in zeonex film

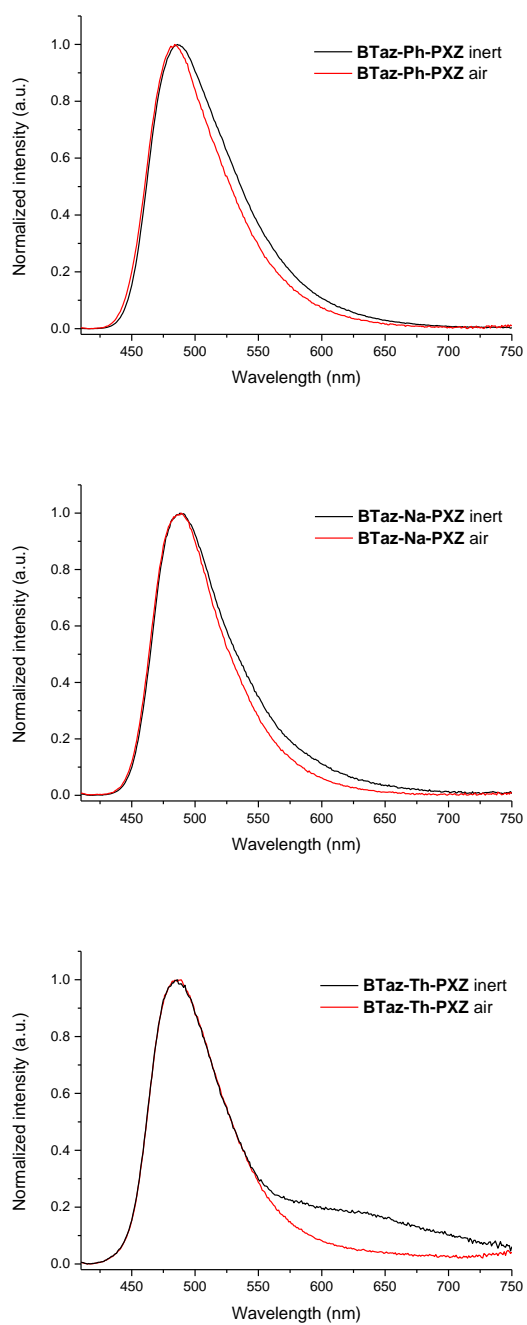

**Figure S11:** Normalised steady-state emission ( $\lambda_{exc} = 400$  nm) spectra measured in inert atmosphere (black) and in air (red) in zeonex for **BTaz-Ph-PXZ** (top), **BTaz-Na-PXZ** (middle), and **BTaz-Th-PXZ** (bottom).

## 11. Laser energy experiments

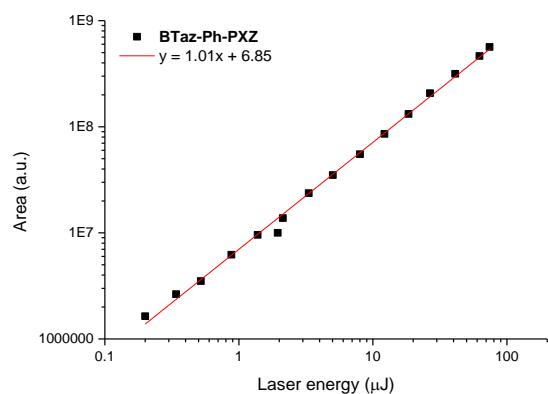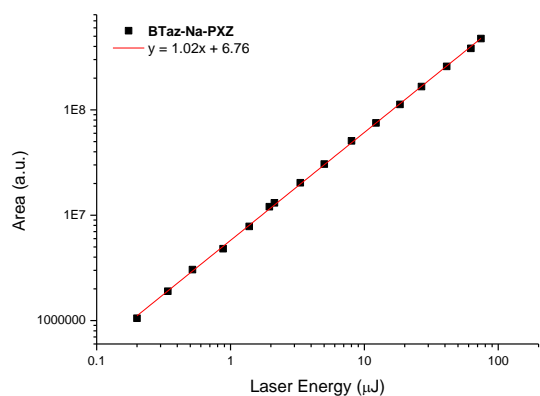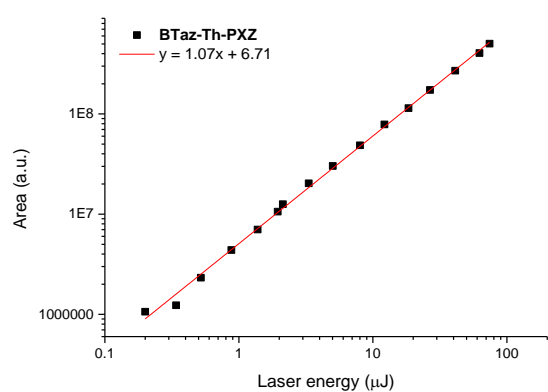

**Figure S12:** Laser power experiments using an  $N_2$  laser for **BTaz-Ph-PXZ** (top; time delay = 50  $\mu\text{s}$ , integration time = 50  $\mu\text{s}$  to 250  $\mu\text{s}$ ), **BTaz-Na-PXZ** (middle; time delay = 150  $\mu\text{s}$ , integration time = 150  $\mu\text{s}$  to 2150  $\mu\text{s}$ ), and **BTaz-Th-PXZ** (bottom; time delay = 50  $\mu\text{s}$ , integration time = 50  $\mu\text{s}$  to 450  $\mu\text{s}$ ).



## 12. Time-resolved emission spectra in solution

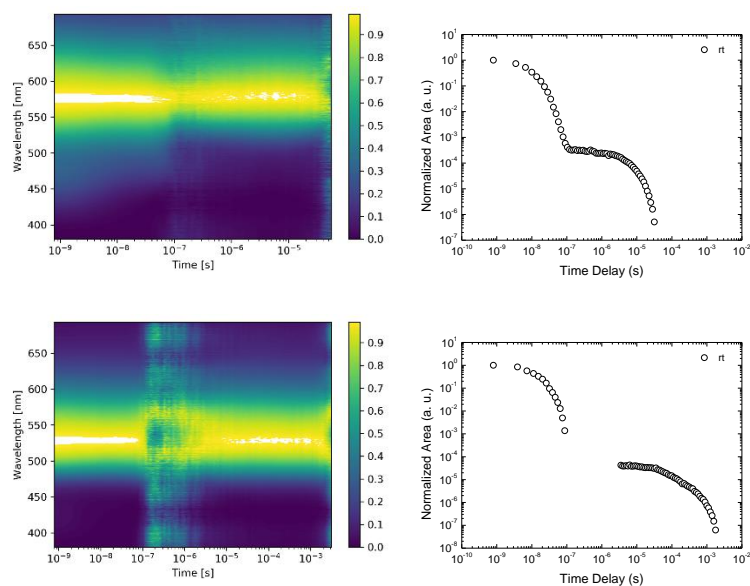

**Figure S13:** Normalised time-resolved emission spectra for **BTaz-Ph-PXZ** in chloroform (top) and toluene (bottom) at room temperature, with the decay of the total emission. Data points without signal have been omitted from the decay.

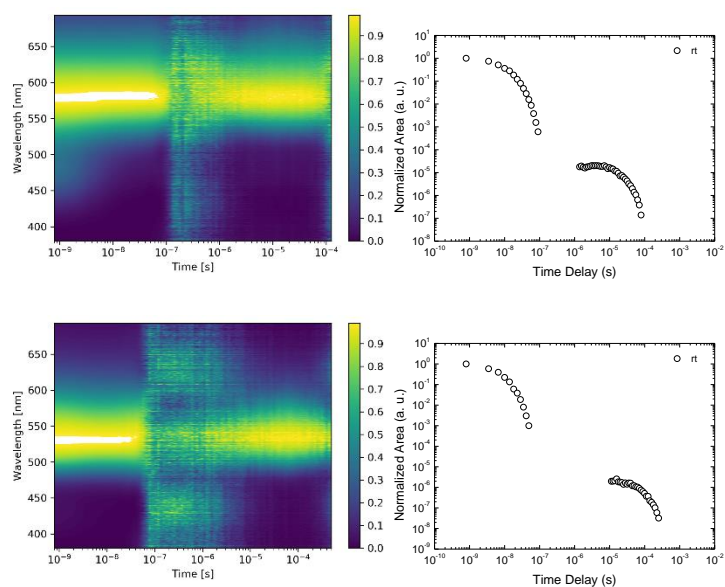

**Figure S14:** Normalised time-resolved emission spectra for **BTaz-Na-PXZ** in chloroform (top) and toluene (bottom) at room temperature, with the decay of the total emission. Data points without signal have been omitted from the decay.

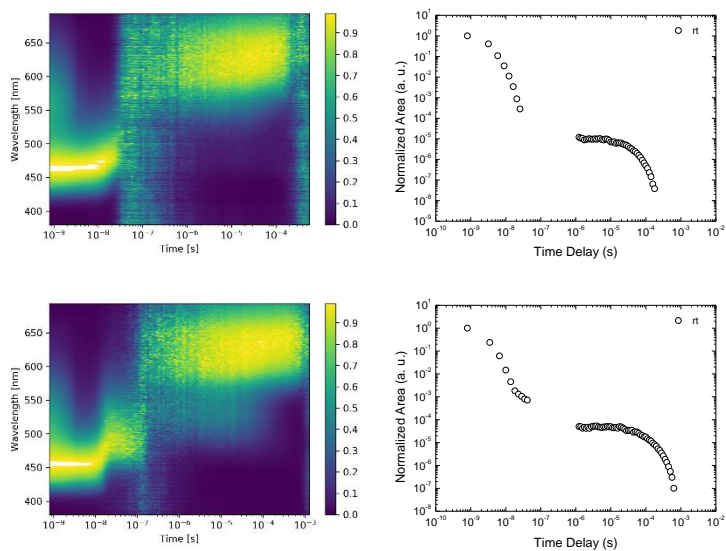

**Figure S15:** Normalised time-resolved emission spectra for *BTaz-Th-PXZ* in chloroform (top) and toluene (bottom) at room temperature, with the decay of the total emission. Data points without signal have been omitted from the decay.

### 13. Singlet oxygen generation

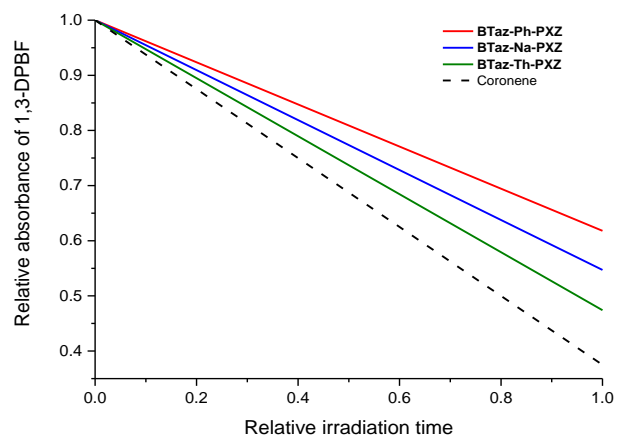

**Figure S16:** Relative decrease in absorbance of 1,3-diphenylisobenzofuran (1,3-DPBF) at 414 nm under continuous irradiation using a single 325 nm LED in the presence of the respective dyad in toluene. Coronene was used as a standard ( $\Phi_{\Delta} = 0.90$  in toluene).

## 14. NMR spectra

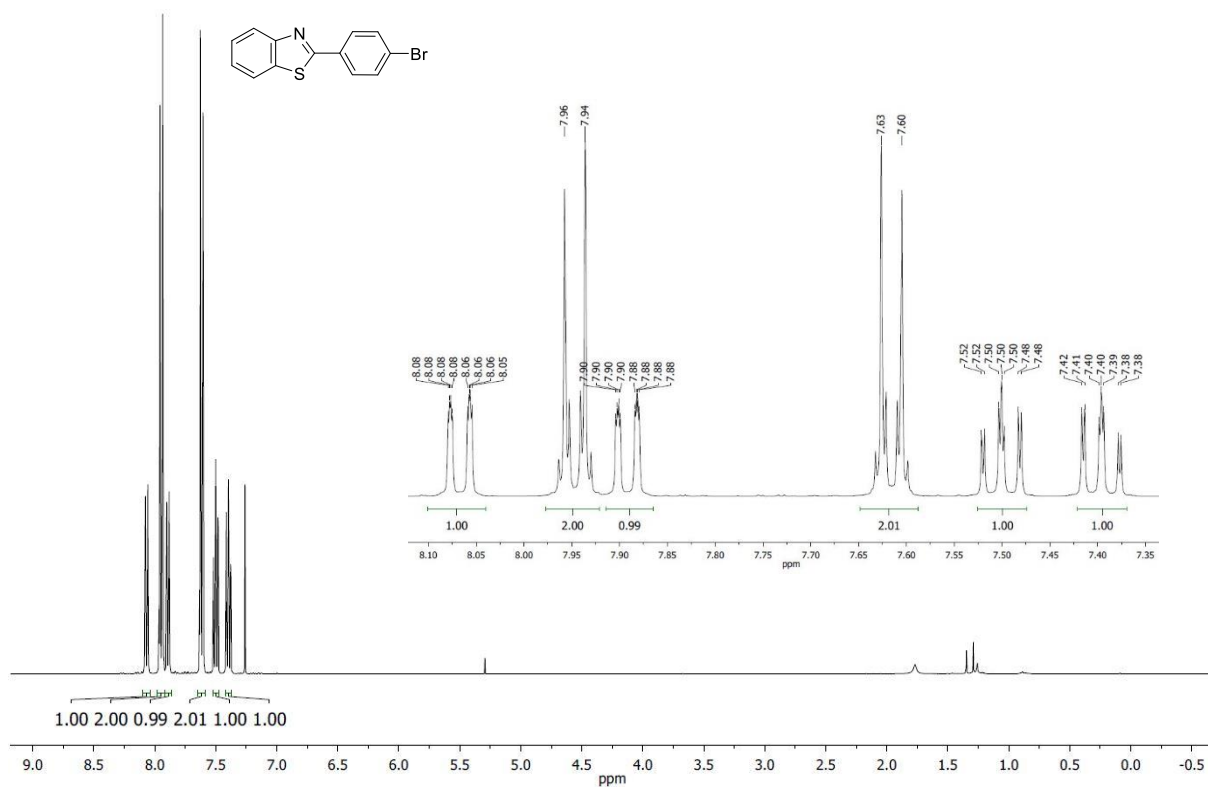

Figure S17: <sup>1</sup>H NMR spectrum of BTaz-Ph in CDCl<sub>3</sub> (400 MHz).

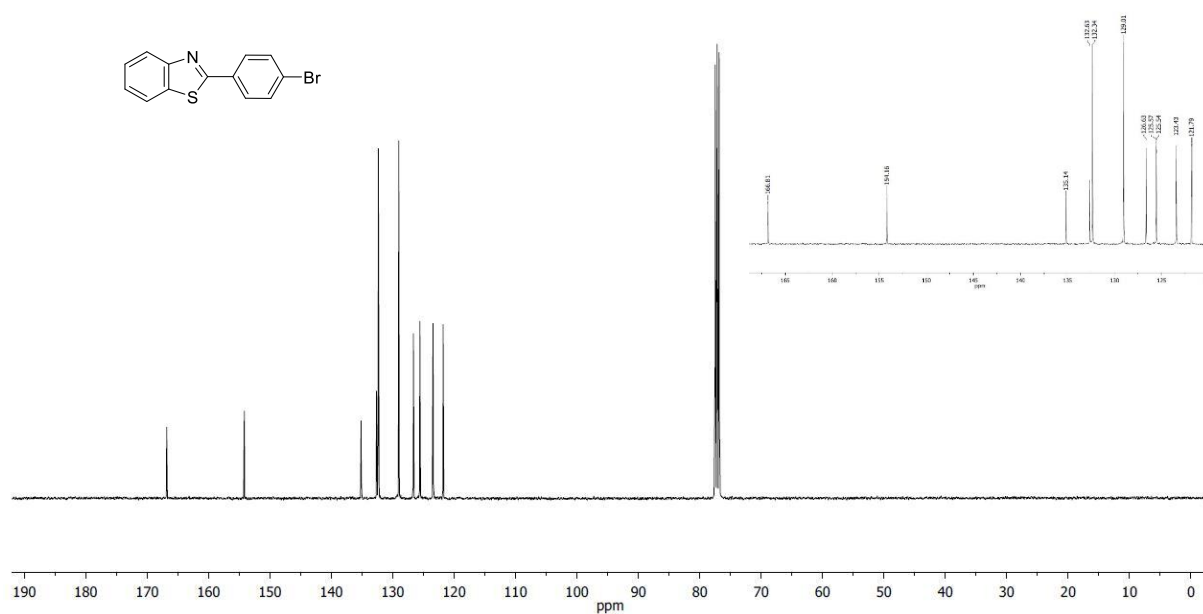

Figure S18: <sup>13</sup>C NMR spectrum of BTaz-Ph in CDCl<sub>3</sub> (100 MHz).

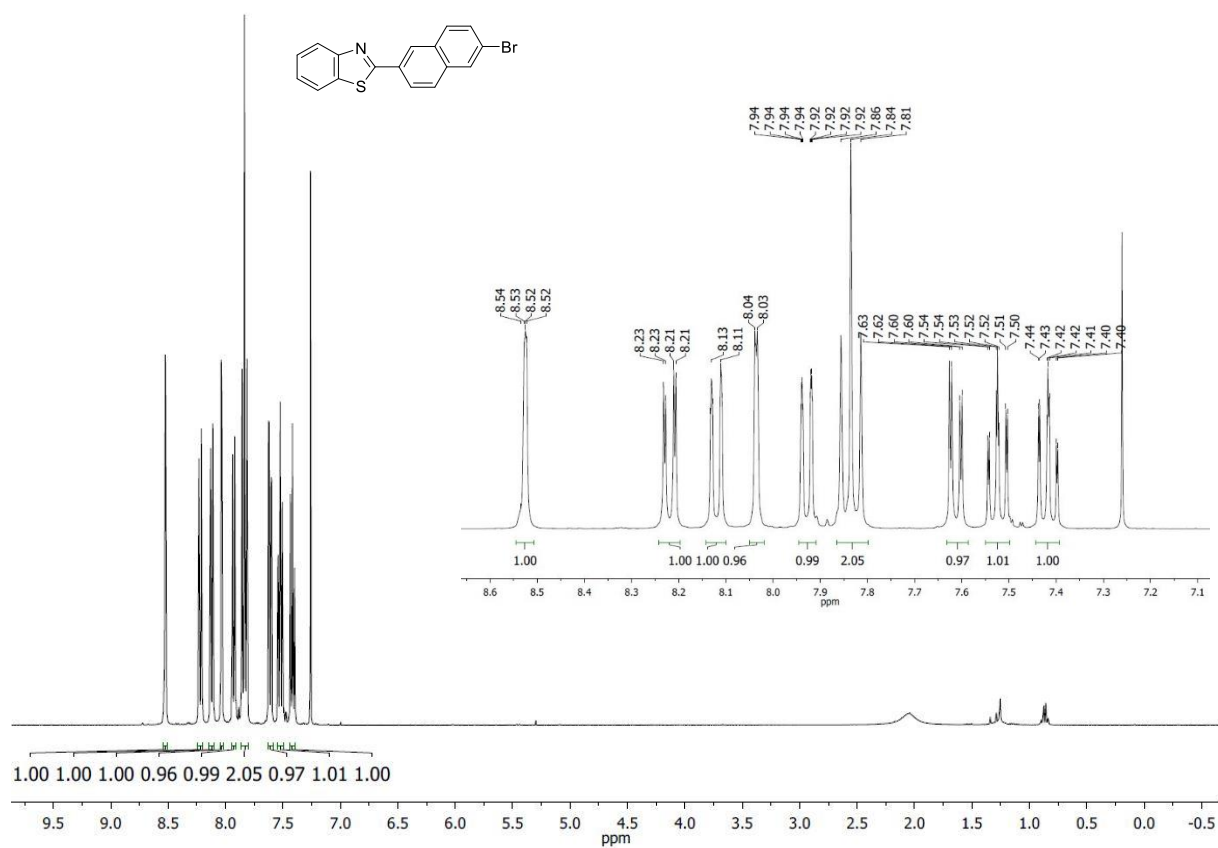

Figure S19: <sup>1</sup>H NMR spectrum of BTaz-Na in CDCl<sub>3</sub> (400 MHz).

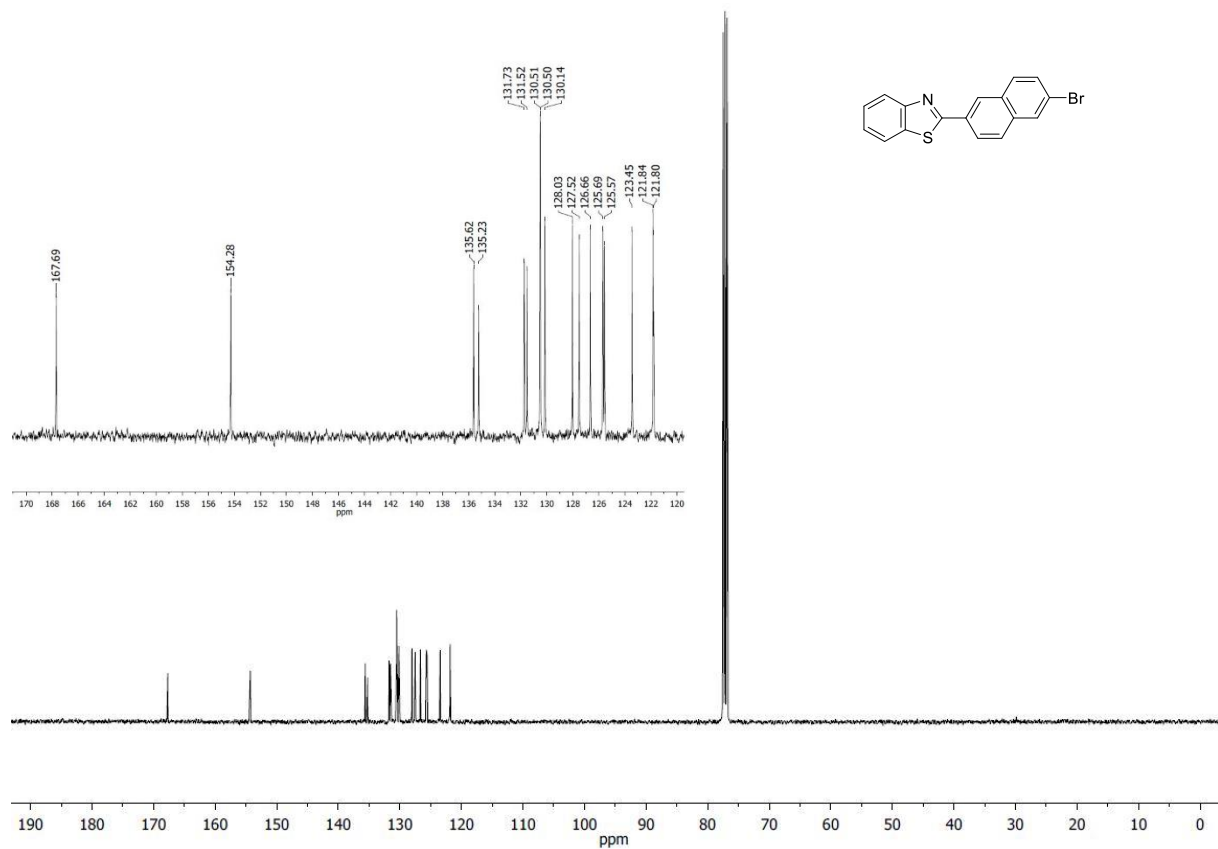

Figure S20: <sup>13</sup>C NMR spectrum of BTaz-Na in CDCl<sub>3</sub> (100 MHz).

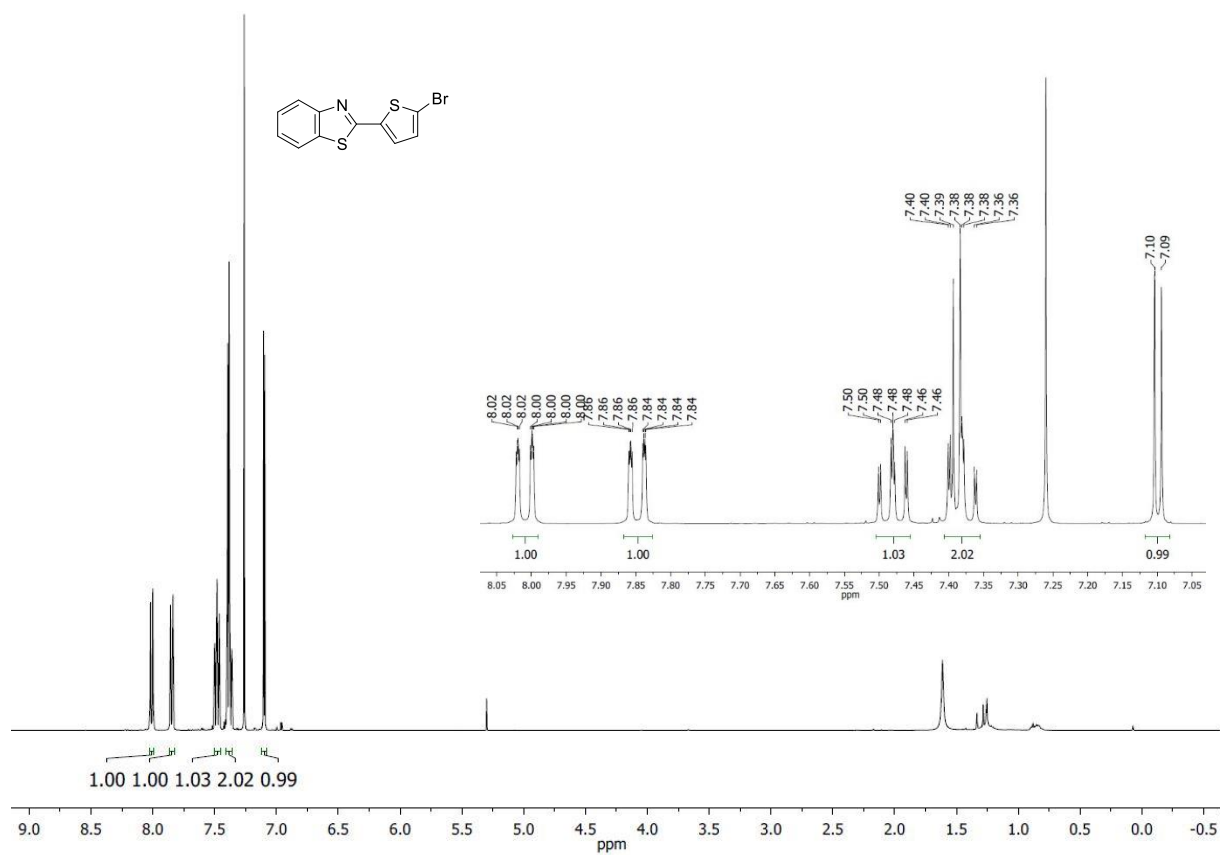

Figure S21: <sup>1</sup>H NMR spectrum of BTaz-Th in CDCl<sub>3</sub> (400 MHz).

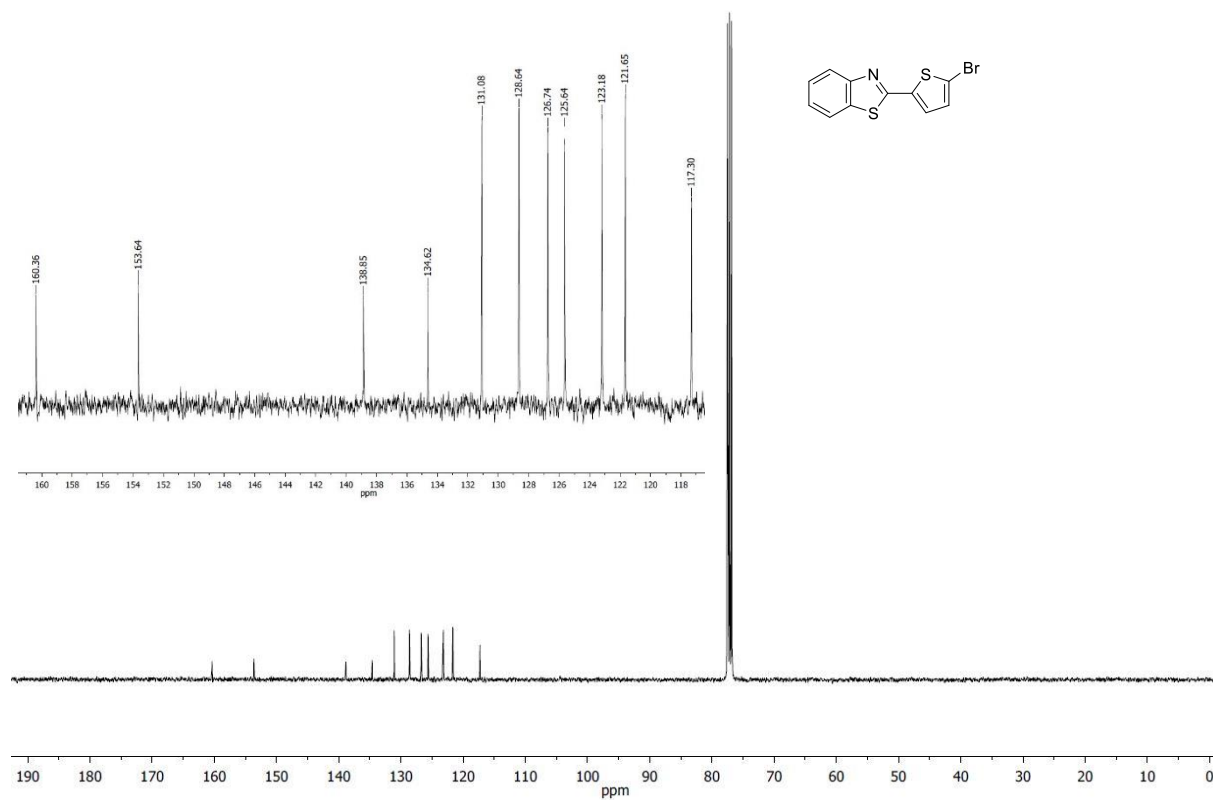

Figure S22: <sup>13</sup>C NMR spectrum of BTaz-Th in CDCl<sub>3</sub> (100 MHz).

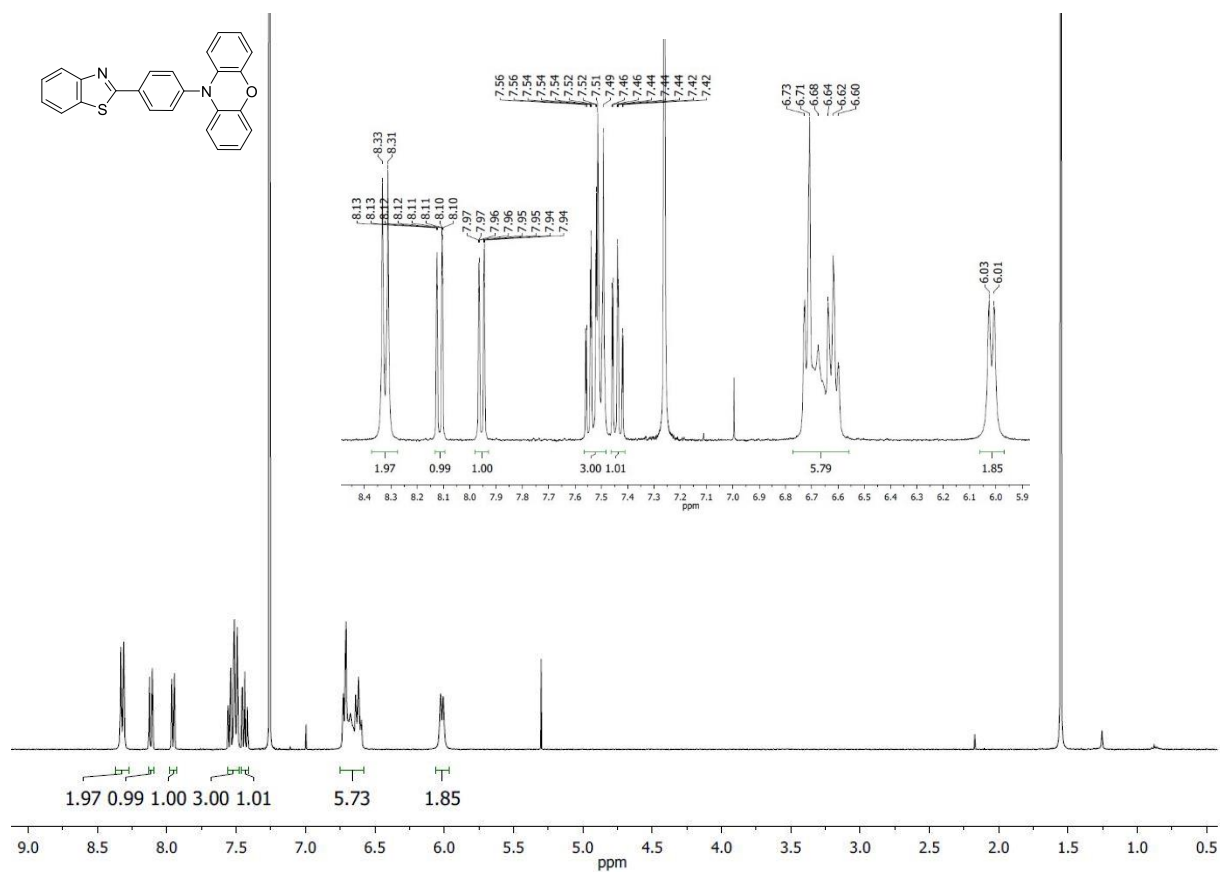

**Figure S23:**  $^1\text{H}$  NMR spectrum of BTaz-Ph-PXZ in  $\text{CDCl}_3$  (400 MHz).

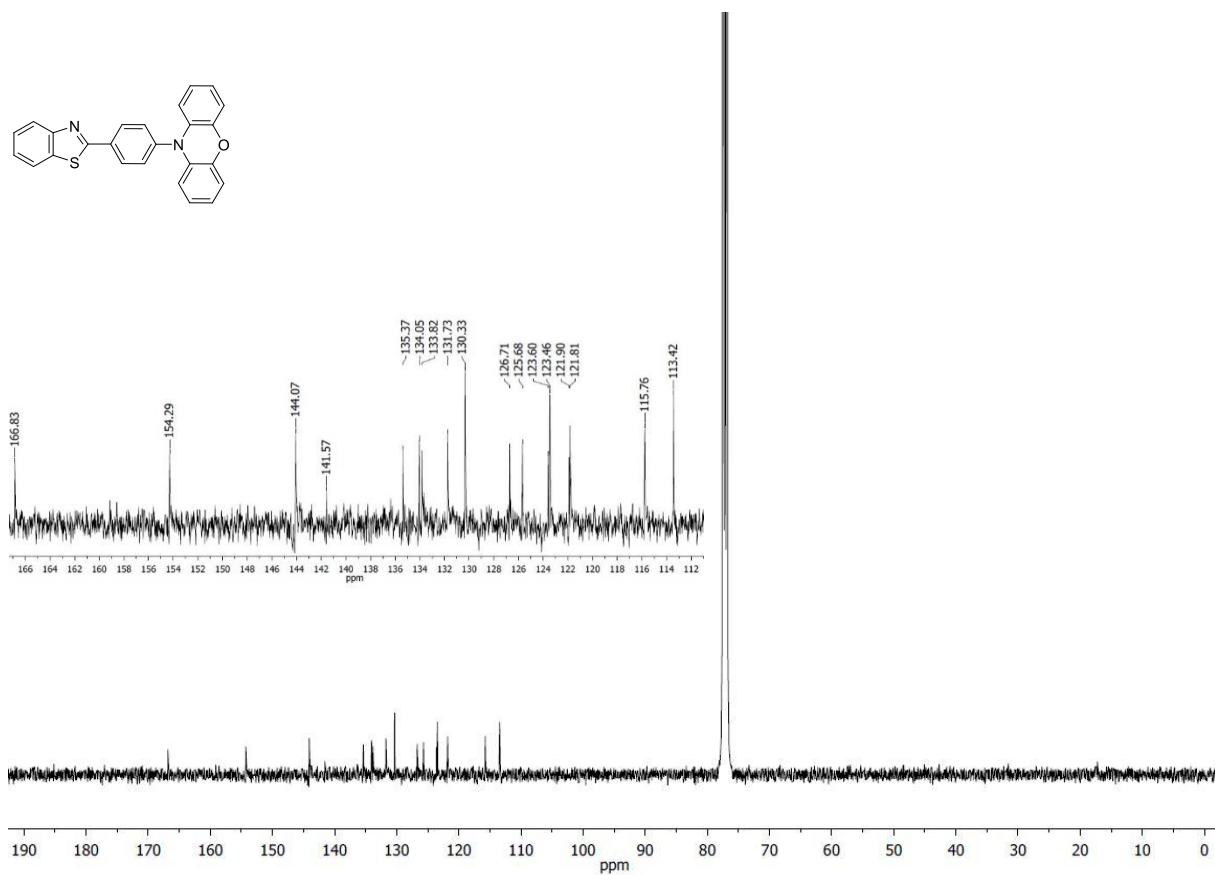

Figure S24: <sup>13</sup>C NMR spectrum of BTaz-Ph-PXZ in CDCl<sub>3</sub> (100 MHz).

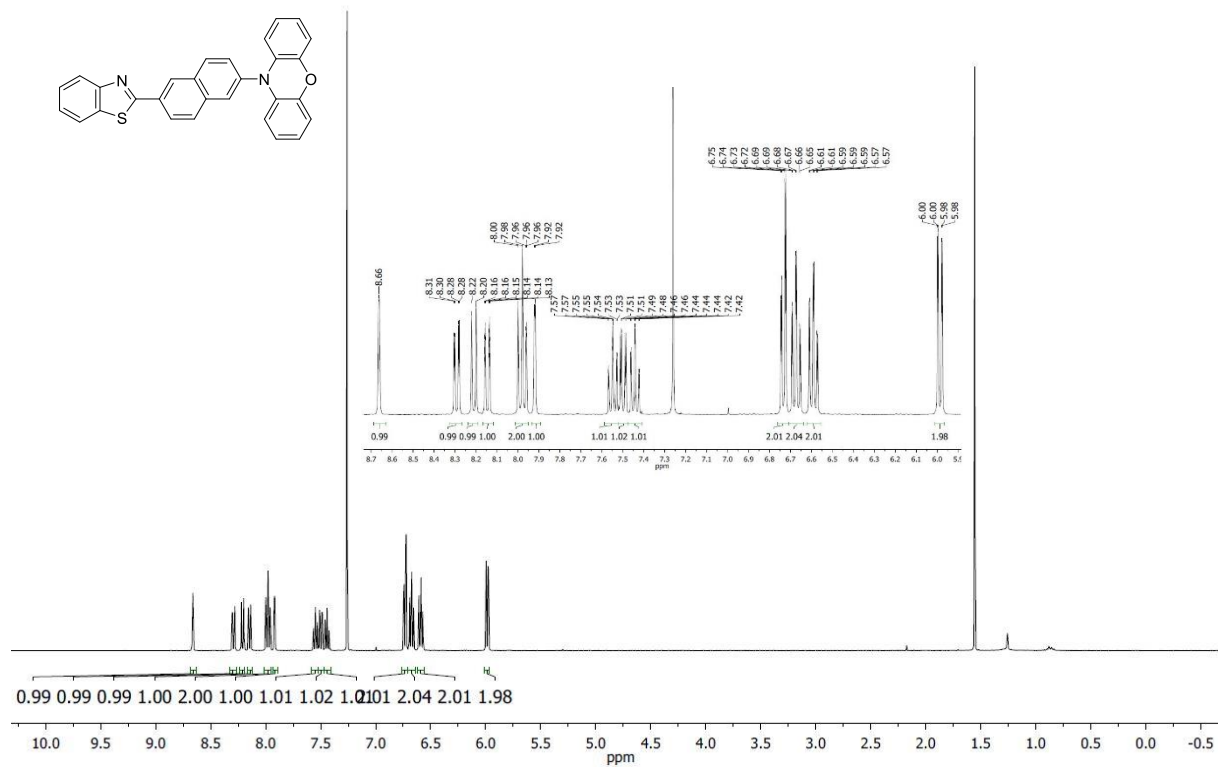

Figure S25: <sup>1</sup>H NMR spectrum of BTaz-Na-PXZ in CDCl<sub>3</sub> (400 MHz).



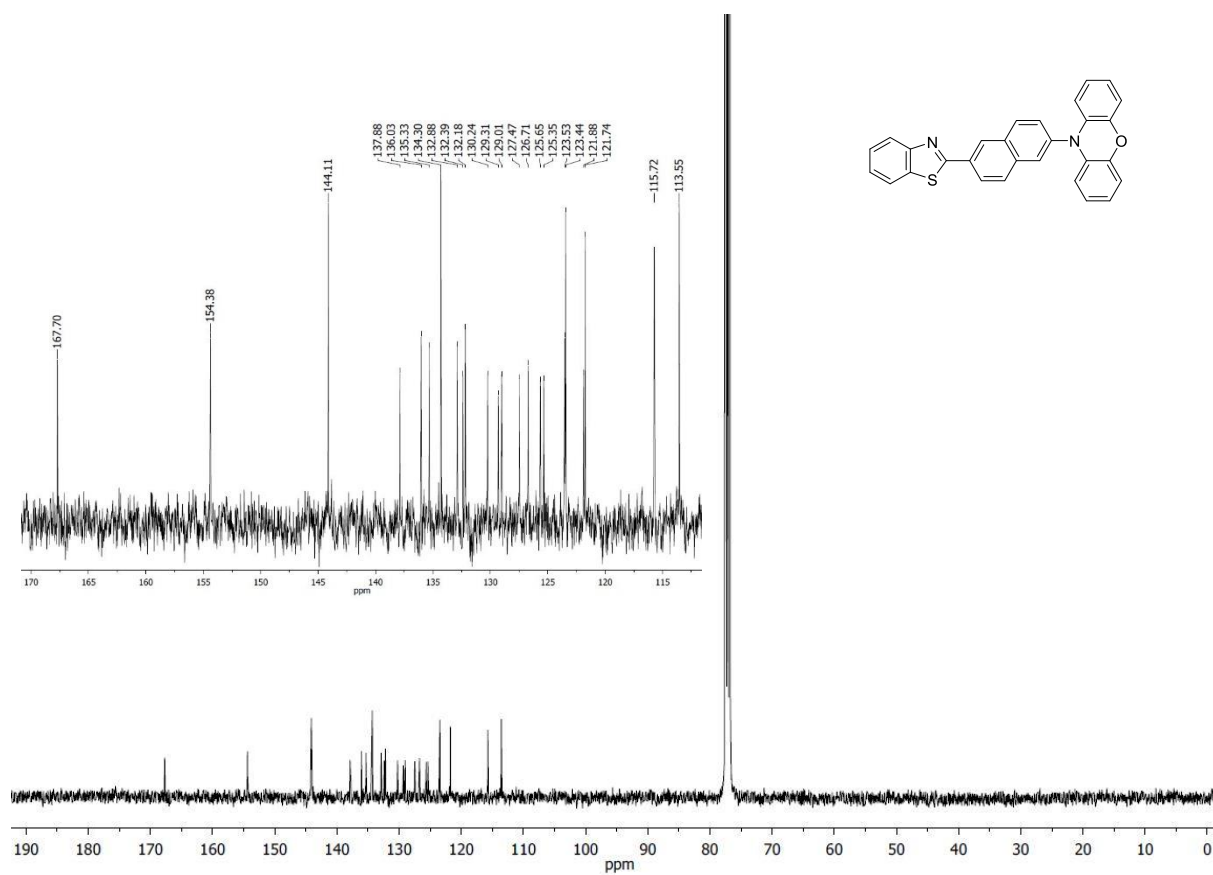

**Figure S26:**  $^{13}\text{C}$  NMR spectrum of BTaz-Na-PXZ in  $\text{CDCl}_3$  (100 MHz).

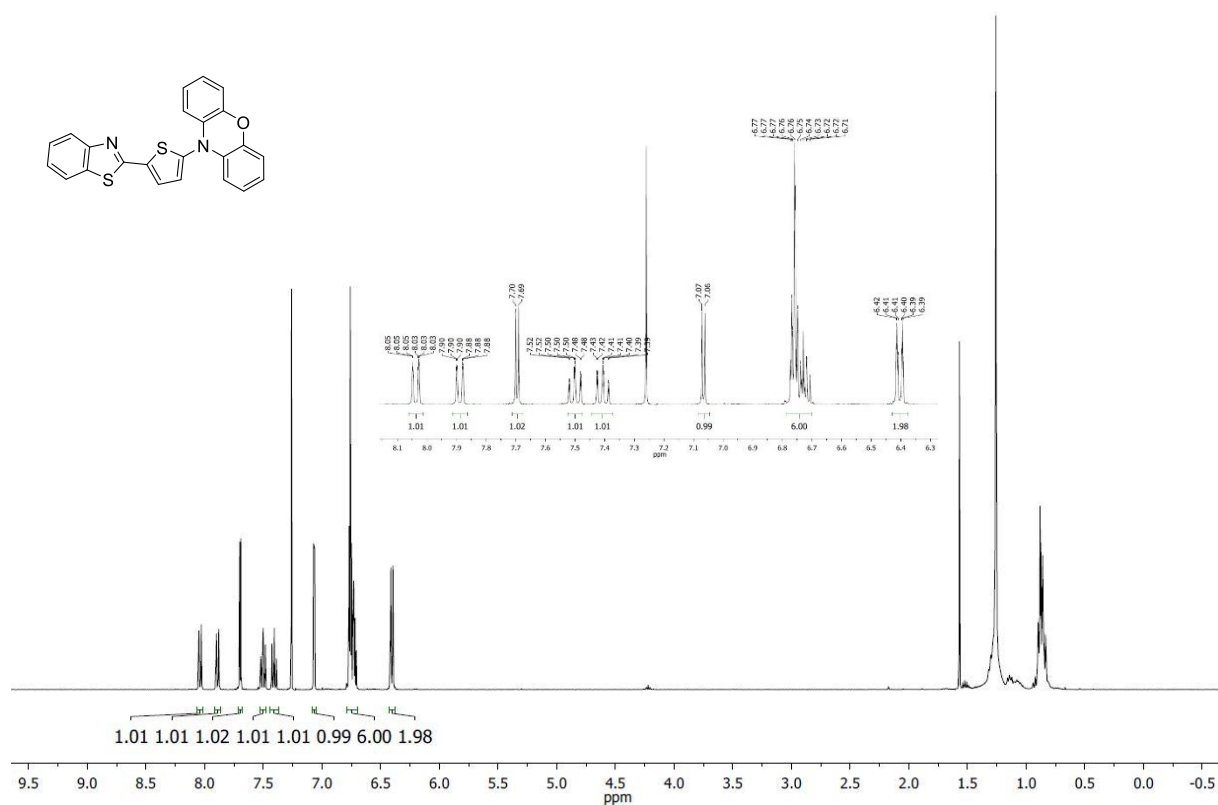

Figure S27: <sup>1</sup>H NMR spectrum of BTaz-Th-PXZ in CDCl<sub>3</sub> (400 MHz).

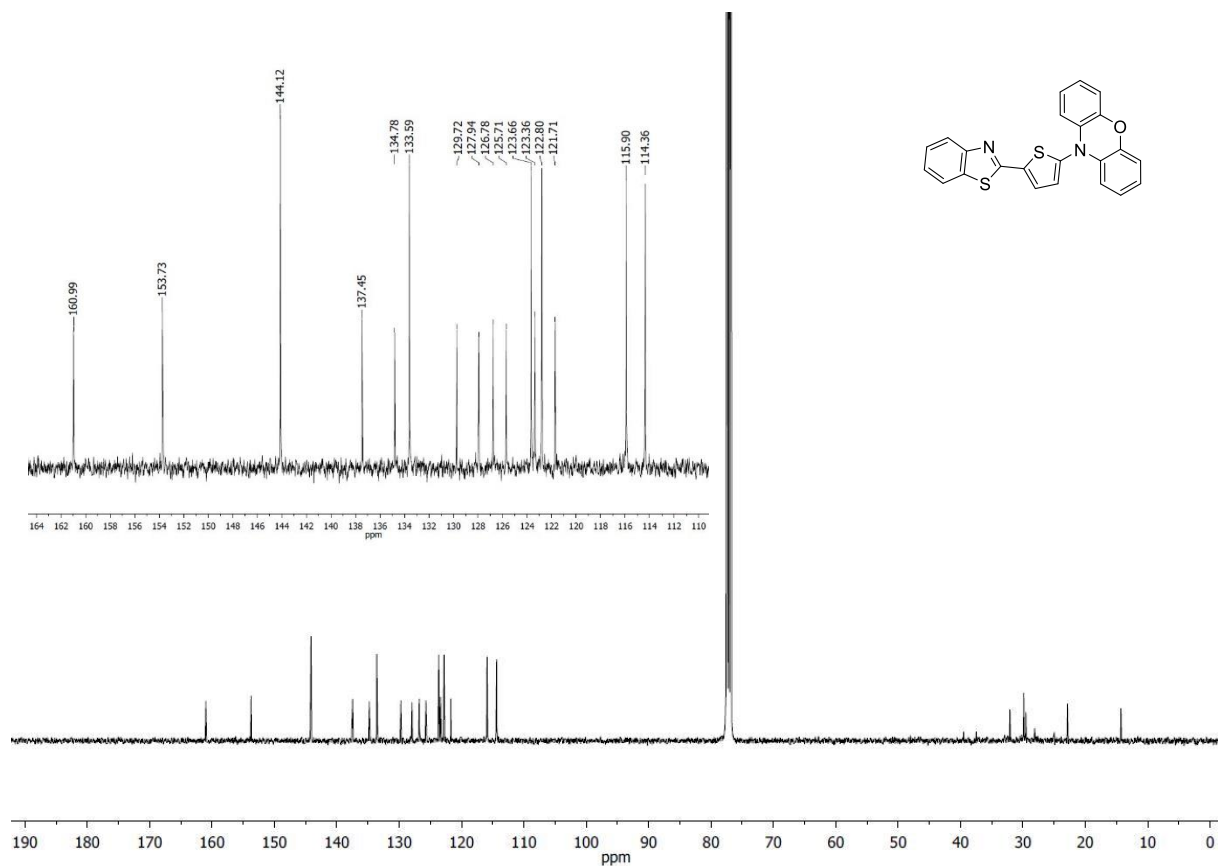

Figure S28: <sup>13</sup>C NMR spectrum of BTaz-Th-PXZ in CDCl<sub>3</sub> (100 MHz).

## 15. Coordinates of optimized geometries

### BTaz-Ph-PXZ

|   |          |          |          |
|---|----------|----------|----------|
| C | 5.46492  | -0.00003 | -0.65282 |
| C | 5.17416  | 0.00003  | 0.72402  |
| C | 6.22230  | 0.00008  | 1.64678  |
| C | 7.52220  | 0.00006  | 1.18471  |
| C | 7.79645  | -0.00000 | -0.18739 |
| C | 6.77461  | -0.00005 | -1.11909 |
| S | 3.97756  | -0.00008 | -1.55701 |
| C | 3.09833  | -0.00001 | -0.01343 |
| N | 3.83917  | 0.00004  | 1.04190  |
| C | 1.63512  | -0.00001 | 0.02251  |
| C | 0.86258  | -0.00003 | -1.14018 |
| C | -0.51864 | -0.00003 | -1.06479 |
| C | -1.14689 | -0.00000 | 0.17479  |
| C | -0.38702 | 0.00002  | 1.33778  |
| C | 0.99434  | 0.00002  | 1.26372  |
| C | -2.63531 | -2.44438 | 0.05012  |
| C | -3.37511 | -3.61620 | -0.06532 |
| C | -4.75607 | -3.56853 | -0.12044 |
| C | -5.39887 | -2.33761 | -0.05718 |
| C | -4.66627 | -1.17574 | 0.06639  |
| O | -5.36486 | 0.00001  | 0.15599  |
| C | -4.66626 | 1.17576  | 0.06637  |
| C | -5.39885 | 2.33763  | -0.05722 |
| C | -4.75604 | 3.56854  | -0.12051 |
| C | -3.37509 | 3.61620  | -0.06539 |
| C | -2.63529 | 2.44438  | 0.05007  |
| C | -3.26855 | 1.20863  | 0.11943  |
| N | -2.56736 | 0.00000  | 0.25413  |
| C | -3.26856 | -1.20863 | 0.11945  |
| H | 5.98960  | 0.00012  | 2.70849  |
| H | 8.34629  | 0.00010  | 1.89385  |
| H | 8.82898  | -0.00001 | -0.52821 |
| H | 6.99216  | -0.00010 | -2.18416 |
| H | 1.34060  | -0.00005 | -2.11813 |
| H | -1.12851 | -0.00005 | -1.96614 |
| H | -0.89732 | 0.00004  | 2.29841  |
| H | 1.60439  | 0.00004  | 2.16262  |
| H | -1.55017 | -2.49015 | 0.09504  |
| H | -2.85501 | -4.56960 | -0.11183 |
| H | -5.33986 | -4.48041 | -0.21192 |
| H | -6.48207 | -2.25300 | -0.09558 |
| H | -6.48205 | 2.25303  | -0.09562 |
| H | -5.33983 | 4.48042  | -0.21200 |
| H | -2.85498 | 4.56960  | -0.11193 |
| H | -1.55015 | 2.49014  | 0.09499  |

### BTaz-Na-PXZ

|   |          |          |          |
|---|----------|----------|----------|
| C | -6.75314 | 0.02211  | -0.45419 |
| C | -6.22304 | -0.03401 | 0.84848  |
| C | -7.09265 | -0.07112 | 1.94090  |
| C | -8.45362 | -0.05130 | 1.71583  |
| C | -8.96601 | 0.00494  | 0.41503  |
| C | -8.12447 | 0.04197  | -0.68150 |
| S | -5.44944 | 0.05878  | -1.60628 |
| C | -4.31007 | -0.00440 | -0.24422 |
| N | -4.85337 | -0.04707 | 0.92490  |
| C | -0.62005 | -0.02531 | 0.44384  |
| C | -0.07834 | 0.00612  | -0.87142 |

|   |           |          |          |
|---|-----------|----------|----------|
| C | 1.32426   | 0.01146  | -1.03573 |
| C | 2.15174   | -0.01215 | 0.05263  |
| C | 1.61732   | -0.04339 | 1.36086  |
| C | 0.26510   | -0.05025 | 1.54937  |
| C | 3.65937   | -2.44314 | 0.11207  |
| C | 4.41269   | -3.60835 | 0.20317  |
| C | 5.79441   | -3.55113 | 0.18422  |
| C | 6.42456   | -2.31719 | 0.07195  |
| C | 5.67762   | -1.16215 | -0.02829 |
| O | 6.35869   | 0.01818  | -0.17665 |
| C | 5.66167   | 1.18557  | -0.00202 |
| C | 6.39301   | 2.34800  | 0.12426  |
| C | 5.74634   | 3.57031  | 0.26573  |
| C | 4.36405   | 3.60811  | 0.28798  |
| C | 3.62643   | 2.43520  | 0.17047  |
| C | 4.26316   | 1.20846  | 0.02032  |
| N | 3.56430   | -0.00143 | -0.12683 |
| C | 4.27958   | -1.20462 | -0.00750 |
| C | -0.96640  | 0.03182  | -1.97008 |
| C | -2.31787  | 0.02788  | -1.77925 |
| C | -2.86564  | -0.00222 | -0.47389 |
| C | -2.01724  | -0.02906 | 0.61064  |
| H | -6.67668  | -0.11464 | 2.94417  |
| H | -9.13958  | -0.07956 | 2.55889  |
| H | -10.04247 | 0.01976  | 0.26233  |
| H | -8.52628  | 0.08563  | -1.69067 |
| H | 1.75734   | 0.03617  | -2.03465 |
| H | 2.30666   | -0.06133 | 2.20315  |
| H | -0.15392  | -0.07403 | 2.55387  |
| H | 2.57372   | -2.49615 | 0.12368  |
| H | 3.90280   | -4.56453 | 0.28946  |
| H | 6.38845   | -4.45818 | 0.25587  |
| H | 7.50765   | -2.22533 | 0.05127  |
| H | 7.47722   | 2.27124  | 0.10073  |
| H | 6.32810   | 4.48347  | 0.35772  |
| H | 3.84129   | 4.55487  | 0.39775  |
| H | 2.54022   | 2.47328  | 0.18563  |
| H | -0.55423  | 0.05503  | -2.97732 |
| H | -2.97813  | 0.04742  | -2.64424 |
| H | -2.44377  | -0.05241 | 1.61140  |

**BTaz-Th-PXZ**

|   |          |          |          |
|---|----------|----------|----------|
| C | -5.26642 | -0.00004 | 0.33745  |
| C | -4.60584 | 0.00005  | -0.90562 |
| C | -5.35884 | 0.00012  | -2.08138 |
| C | -6.73624 | 0.00011  | -1.99596 |
| C | -7.37869 | 0.00003  | -0.75359 |
| C | -6.65319 | -0.00005 | 0.42422  |
| S | -4.08863 | -0.00012 | 1.62232  |
| C | -2.82031 | -0.00002 | 0.38004  |
| N | -3.23435 | 0.00005  | -0.84208 |
| C | -1.42693 | -0.00004 | 0.75838  |
| C | -0.87697 | -0.00007 | 2.01378  |
| C | 0.53316  | -0.00006 | 1.99847  |
| C | 1.04583  | -0.00002 | 0.73474  |
| S | -0.21206 | 0.00000  | -0.48043 |
| C | 2.45148  | -2.45060 | 0.28920  |
| C | 3.13784  | -3.62533 | 0.00729  |
| C | 4.43245  | -3.57687 | -0.47838 |
| C | 5.04019  | -2.34460 | -0.68236 |
| C | 4.35868  | -1.17713 | -0.40309 |
| O | 5.02384  | 0.00003  | -0.62132 |
| C | 4.35867  | 1.17717  | -0.40305 |

|   |          |          |          |
|---|----------|----------|----------|
| C | 5.04015  | 2.34466  | -0.68228 |
| C | 4.43240  | 3.57692  | -0.47824 |
| C | 3.13779  | 3.62534  | 0.00743  |
| C | 2.45145  | 2.45059  | 0.28929  |
| C | 3.05071  | 1.21373  | 0.08762  |
| N | 2.39244  | -0.00001 | 0.36925  |
| C | 3.05072  | -1.21372 | 0.08757  |
| H | -4.84195 | 0.00019  | -3.03746 |
| H | -7.33208 | 0.00017  | -2.90533 |
| H | -8.46516 | 0.00002  | -0.71074 |
| H | -7.15626 | -0.00011 | 1.38788  |
| H | -1.47126 | -0.00009 | 2.92326  |
| H | 1.16691  | -0.00008 | 2.88015  |
| H | 1.43518  | -2.49075 | 0.67303  |
| H | 2.64673  | -4.58074 | 0.17239  |
| H | 4.97560  | -4.49122 | -0.70117 |
| H | 6.05503  | -2.26089 | -1.06298 |
| H | 6.05500  | 2.26098  | -1.06290 |
| H | 4.97554  | 4.49128  | -0.70100 |
| H | 2.64667  | 4.58074  | 0.17256  |
| H | 1.43515  | 2.49071  | 0.67313  |
